# Supplementary material for: Abnormal developmental control of replication-timing domains in pediatric acute lymphoblastic leukemia
Source: HighWire-hosted journal article supplement (doi:10.1101/gr.138511.112), 2012-05-24
Supplement: GR_supplemental_figures.pdf [file GR_supplemental_figures.pdf]

Patient samples

| #  | Diagnosis          | Lab #  | Age        | Gender | WBC Count | NCI Risk | Disease Stage        | Karyotype                                                                                                                                                        | Comments                                      |
|----|--------------------|--------|------------|--------|-----------|----------|----------------------|------------------------------------------------------------------------------------------------------------------------------------------------------------------|-----------------------------------------------|
| 1  | ALL (B), Pediatric | 10-212 | 1 1/2 yrs  | M      | 2.1       | SR       | New Diagnosis        | 54,XY,+X,+4,+6,+10,+14,+17,+21,+21[15]/46,XY[5]                                                                                                                  | triple trisomy                                |
| 2  | ALL (B), Pediatric | 11-064 | 8 yrs      | F      | 20.2      | SR       | New Diagnosis        | 45,XX,del(6)(q?13),i(9)(q10),-13,der(19)t(1;19)(q2?1;p13)[15]/46,XX[5]                                                                                           | TCF3/PBX1                                     |
| 3  | ALL (B), Pediatric | 11-220 | 17 mon     | F      | 14        | SR       | New Diagnosis        | 55,XX,+X,+4,+6,+10,del(10)(q2?4),+14,+17,+18,+21,+21[18]/46,XX[2]                                                                                                | triple trisomy                                |
| 4  | ALL (B), Pediatric | 10-770 | 12 yrs     | F      | 70        | HR       | New Diagnosis        | 46,XX[36]                                                                                                                                                        |                                               |
| 5  | ALL (B), Pediatric | 10-771 | 7 12 yrs   | M      | 65        | HR       | New Diagnosis        | 46,XY,del(6)(q13q21),t(12;15)(p13;q15)[13]/46,XY[7], including t(12;21)                                                                                          | ETV6/RUNX1                                    |
| 6  | ALL (B), Pediatric | 10-820 | 13 1/2 yrs | F      | 3.5       | HR       | New Diagnosis        | 46,XX,t(9;15)(q13;p1?1.2)[18]/46,XX[2]                                                                                                                           |                                               |
| 7  | ALL (B), Pediatric | 11-132 | 15 yrs     | F      | 70.1      | HR       | New Diagnosis        | 46,XX,t(12;17)(p13;q12)[16]/46,XX[4]                                                                                                                             |                                               |
| 8  | ALL (B), Pediatric | 11-015 | 4 yrs      | M      | >50       | HR       | New Diagnosis        | no available data                                                                                                                                                |                                               |
| 9  | ALL (B), Pediatric | 11-253 | 9 1/2 yrs  | F      | 190       | HR       | New Diagnosis        | 45,XY,-20[18]/46,XY[2], including (14q32)/CRLF2 (Yp11.3)<br>45,Y,add(X)(p22.1),add(1)(p3?4),del(6)(q1?1.2q2?2),-9,add(12)(q2?2),t(17;19)(q22;p13.3)[1]/46,XY[24] | (14q32)/IGH@/CRLF2 (Yp11.3)                   |
| 10 | ALL (B), Pediatric | 10-822 | 11 1/2 yrs | M      | 19.7      | N/A      | Relapse              | 46,XX[26]                                                                                                                                                        | E2A/HLF                                       |
| 11 | ALL (B), Pediatric | 10-838 | 18 yrs     | F      | 145.9     | N/A      | Relapse              | 46,XX[26]                                                                                                                                                        | Normal                                        |
| 12 | ALL (B), Pediatric | 11-118 | 5 yrs      | F      | 20.1      | N/A      | Relapse              | 46,XY[20] including t(12;21)                                                                                                                                     | ETV6/RUNX1                                    |
| 13 | ALL (B), Pediatric | 11-221 | 6 yrs      | M      | 73        | N/A      | Secondary malignancy | 46,XY,t(11;19)(q23;p13.3)[20]                                                                                                                                    | 11q23, treatment related secondary malignancy |
| 14 | ALL (B), Pediatric | 10-668 | 6yrs       | M      | 278       | VHR      | New Diagnosis        | 46,XY,del(9)(p13),t(9;22)(q34;q11.2)[12]/46,XY,del(9)(p13),der(9)t(9;22)(q34;q11.2),ider(22)(q10)t(9;22)(q34;q11.2)[4]/46,XY[7]                                  | BCR/ABL                                       |
| 15 | ALL (T), Pediatric | 10-799 | 4 yrs      | F      | 35        | HR       | New Diagnosis        | 46,XX,t(5;14)(q35;q11.2)[14]/46,XX[6]                                                                                                                            |                                               |
| 16 | ALL (T), Pediatric | 10-828 |            |        |           |          |                      |                                                                                                                                                                  |                                               |
| 17 | AML M2, Pediatric  | 10-356 | 12 yr      | M      |           | N/A      | New Diagnosis        | 46,XY,t(6;9)(p23;q34),del(15)(q11.2q15)[2]/45,sl,-Y[cp4]/46,sdl1,+4[5]/47,sdl2,+13[5]/46~47,sdl2,+mar1[cp3]/48,sdl3,+mar1[1]                                     | FLT3-ITD                                      |

Leukemic cell lines

| # | Diagnosis          | Name      | Age    | Gender | Karyotype                                                                                                                                                                                                                       | Comments   |
|---|--------------------|-----------|--------|--------|---------------------------------------------------------------------------------------------------------------------------------------------------------------------------------------------------------------------------------|------------|
| 1 | ALL (B), Pediatric | REH       | 15 yrs | F      | 47,X,-X,del(3)(p12.3~p22.3),t(4;12)inv(12)(p13q23),t(5;12;16;21)(q31;p13;q24.3;q22),del(9)(p21.3),bder(16)(16;21)(q24.3;q22),t(18;21)(q11.2;p11.2). ish del(9)(p21.3).(q11.2;p11.2). ish del(9)(p21.3).(RP11615P15-RP11467K20-) | ETV6/RUNX1 |
| 2 | ALL (B), Pediatric | RCH-ACV   | 8 yrs  | F      | 47,XX,t(1;19)(q23;p13),del(6)(q14.1 q15),+8                                                                                                                                                                                     | TCF3/PBX1  |
| 3 | ALL (B), Pediatric | MHH-CALL2 | 15 yrs | F      | 52,XX,+8,+10,+18,+18,+21,+21 [Alternative: 51,XX,+X,+18,+der(18)t(15;18)(q13.1;q22.1),+21,+21]                                                                                                                                  |            |

Lymphoblast cell lines

| # | Type   | Name    | Age    | Gender | Karyotype      |
|---|--------|---------|--------|--------|----------------|
| 1 | B-cell | C0202   | 35 yrs | M      | 46,XY          |
| 2 | B-cell | GM06990 | 41 yrs | F      | 46,XX          |
| 3 | B-cell | GM06999 | 15 yrs | F      | 46,XX          |
| 4 | B-cell | NC-NC   | 27 yrs | F      | 45/46 XX/X, -X |
| 5 | T-cell | TC      |        |        |                |

**Figure S1.** Properties of cell lines and patient samples analyzed. For patient samples obtained through COG, clinical features and NCI risk stratification are indicated, with NCI categories representing VHR: very high risk; HR: high risk; SR: standard risk. Properties listed were determined at the time of sample collection.

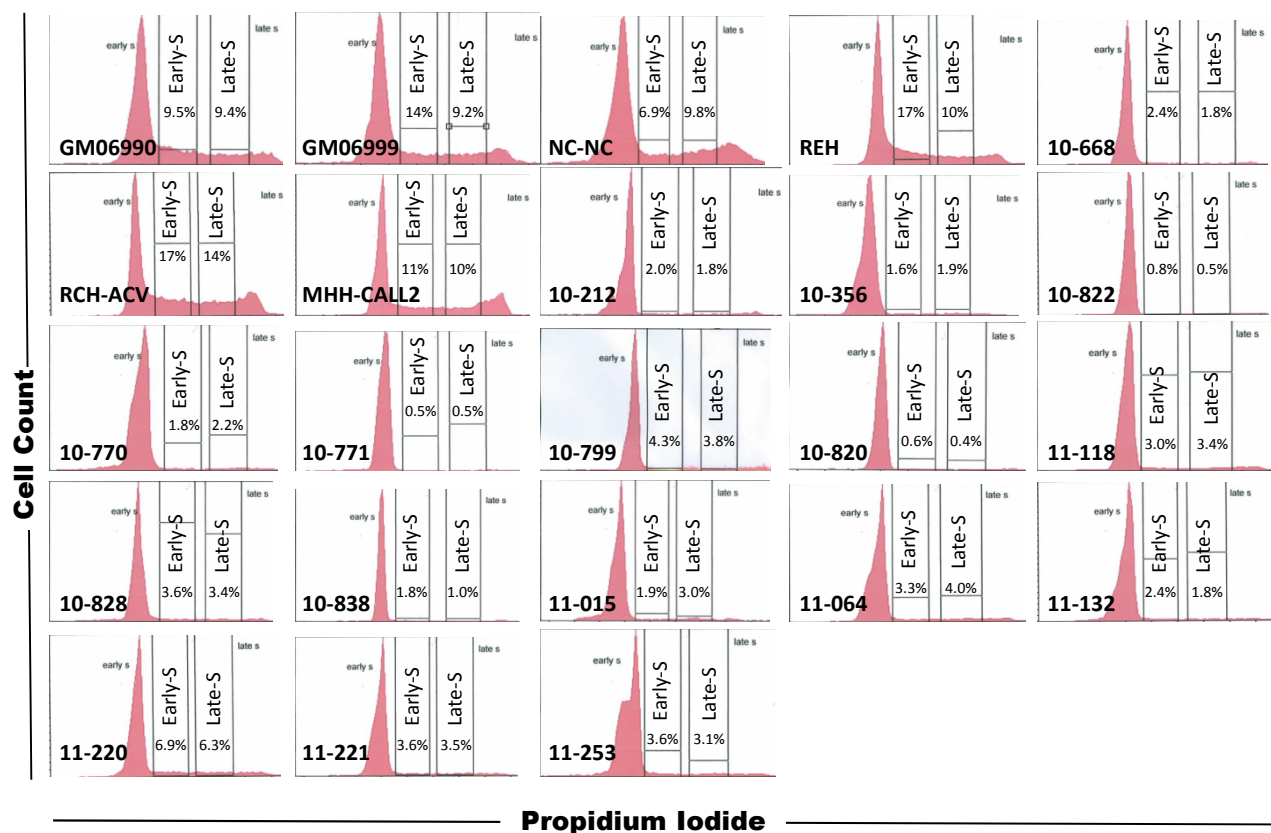

**Figure S2.** FACS profiles of samples analyzed in this study. Cells were sorted on a FACSaria flow cytometer using standard procedures. The indicated early and late S-phases were isolated for replication timing analysis as described in Methods. Percentages shown are those of total sorted cells collected in each fraction.

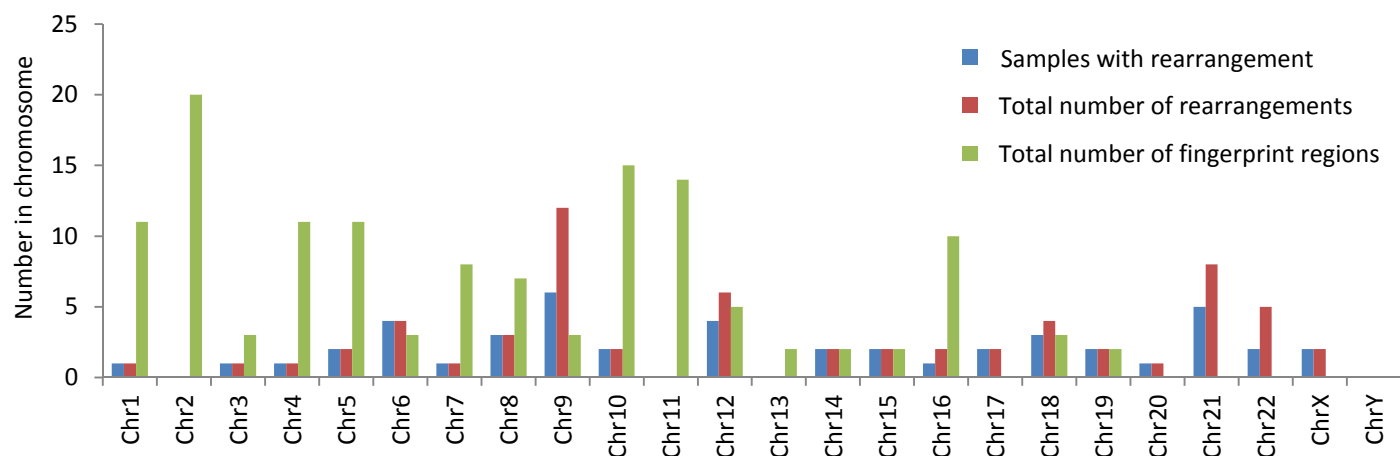

**Figure S3.** Chromosome distribution of replication fingerprint regions and chromosomal breakpoints. Histogram depicts the number of samples with karyotypic rearrangement, total number of karyotypic rearrangements, and number of fingerprint regions for each chromosome. The number and distribution of all fingerprint regions (leukemia-specific timing changes in Supplementary Table 2) are less clustered into commonly rearranged chromosomes than breakpoints than those in leukemic sample karyotypes.

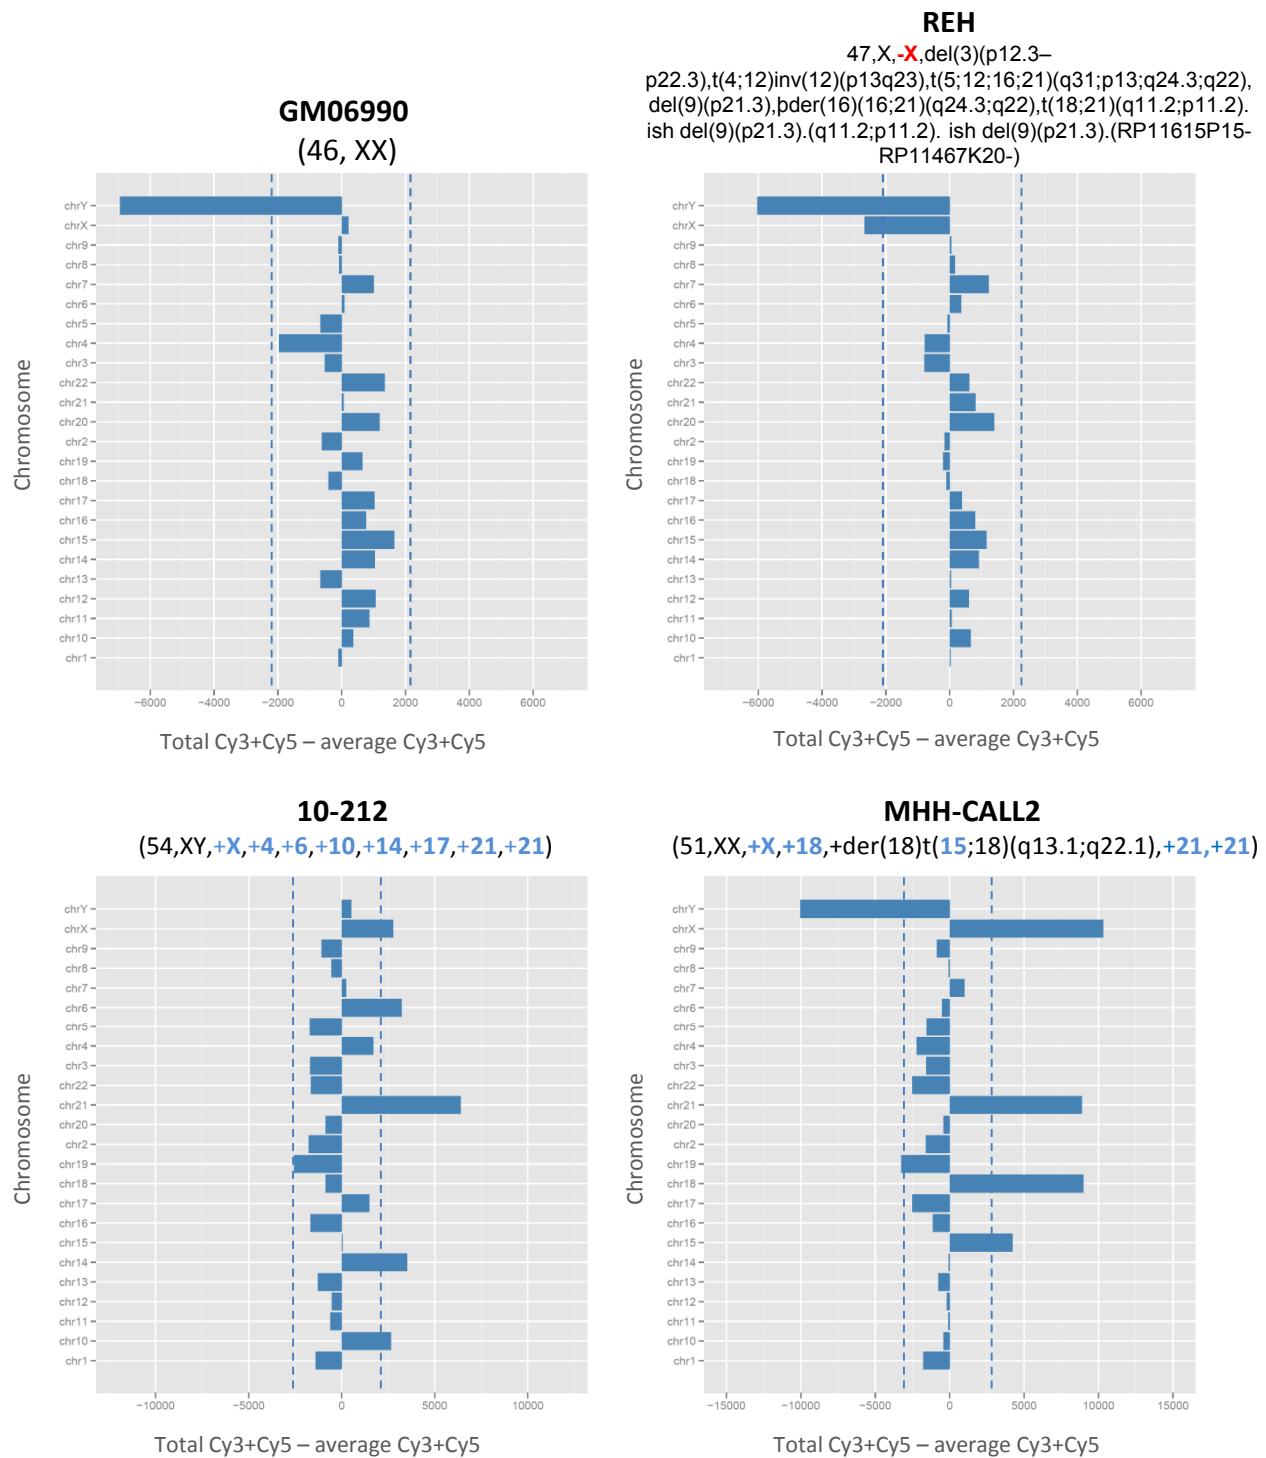

**Figure S4.** Identification of hyper- or hypodiploid chromosomes by chromosome-wide average Cy3+Cy5 values. Chromosomes with gains or losses in copy number can typically be identified as those with significant deviations from average total intensity on the array, as the number amount of nascent strands hybridized is roughly proportional to the number of copies of each locus. Karyotypic gains and losses of greater than half of a chromosome are highlighted in blue and red, respectively.

# Reh karyotype

A

47,X,-X,del(3)(p12.3-p22.3),t(4;12)inv(12)(p13q23),t(5;12;16;21)(q31;p13;q24.3;q22),del(9)(p21.3),pder(16)(16;21)(q24.3;q22),t(18;21)(q11.2;p11.2). ish del(9)(p21.3).(q11.2;p11.2) ish del(9)(p21.3).(RP11615P15-RP11467K20-)

B

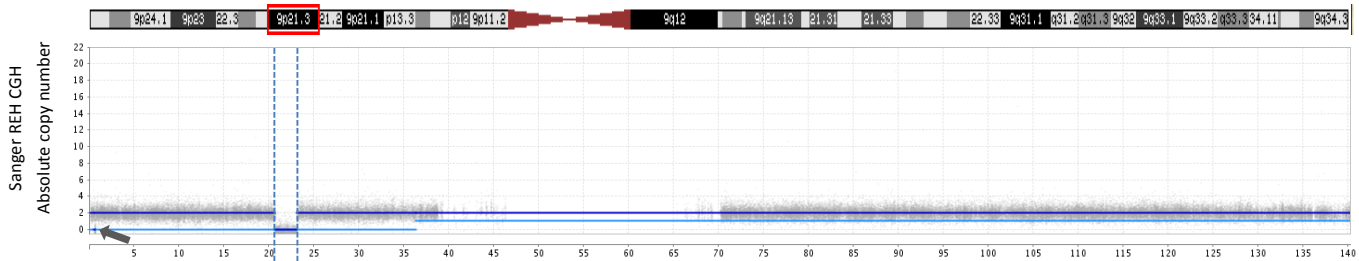

C

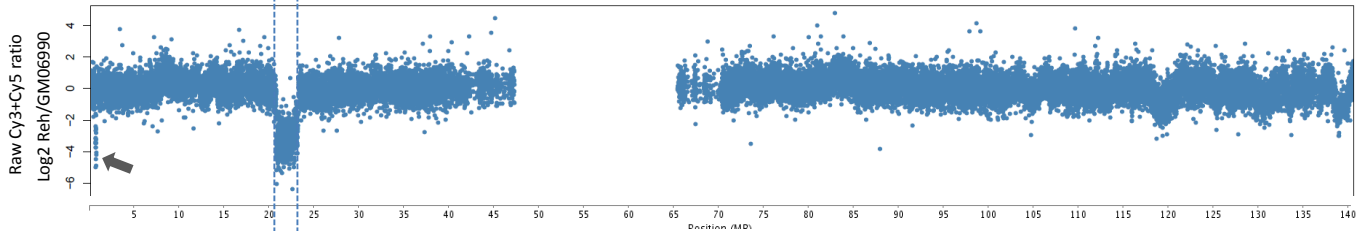

D

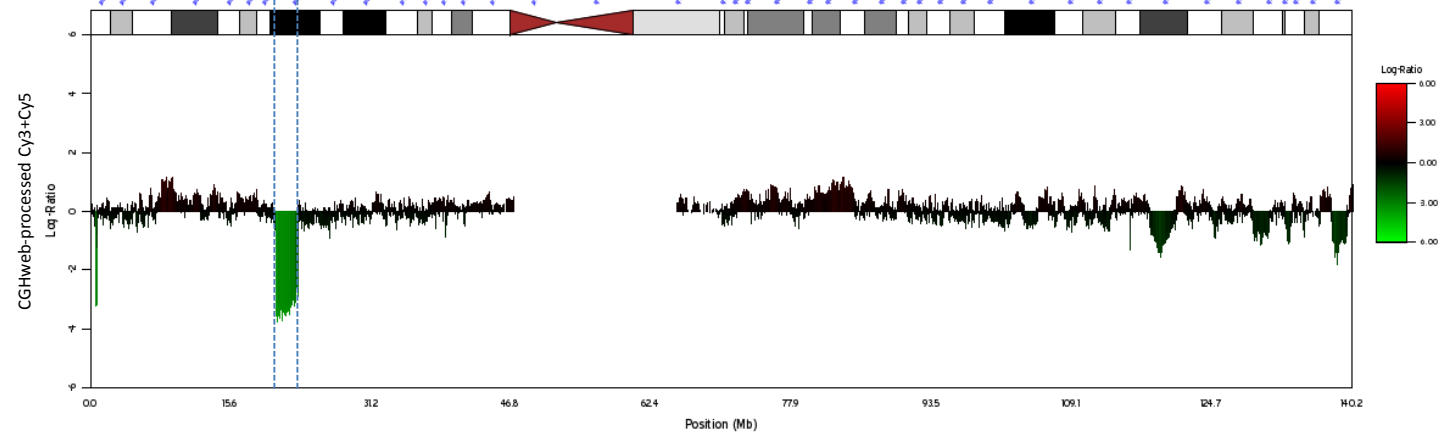

**Figure S5.** Confirmation of copy number variants in REH using raw replication timing array values. Example of CNVs in chromosome 9 from regions with deletions previously identified from karyotype analysis (del(9)(p21.3); A) and CGH analysis from the Sanger Cancer Genome Project (B). Copy number variations in the leukemic cell line REH are readily detected as abrupt shifts to lower Cy3+Cy5 intensity in REH cells versus a normal karyotype control (C,D). Raw timing array values also detect a small (~20 kb) interstitial deletion in 9p21.3 (arrow in C) in agreement with that detected by CGH (arrow in B).

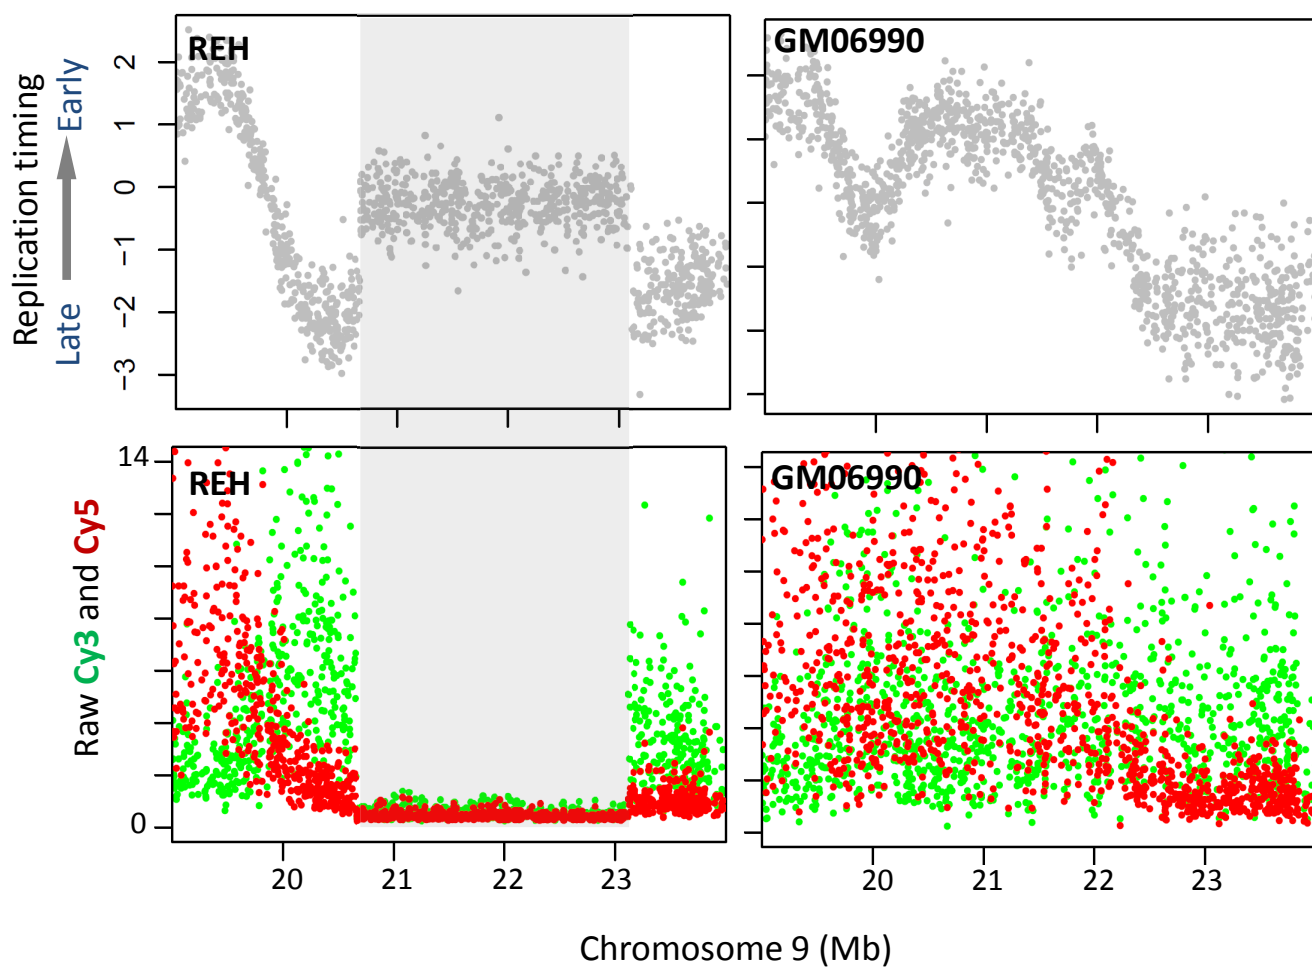

**Figure S6.** Verification of karyotypically known rearrangements in REH by abrupt changes in replication timing and array intensity. A known deletion in REH on chromosome 9 is readily detected as a shift of replication timing ratios to 0 (indicating no hybridization above background in early or late channels) and as a sharp drop in Cy3 and Cy5 dye intensities to background levels. The corresponding region in B-cell line GM06990 lacks the rearrangement.

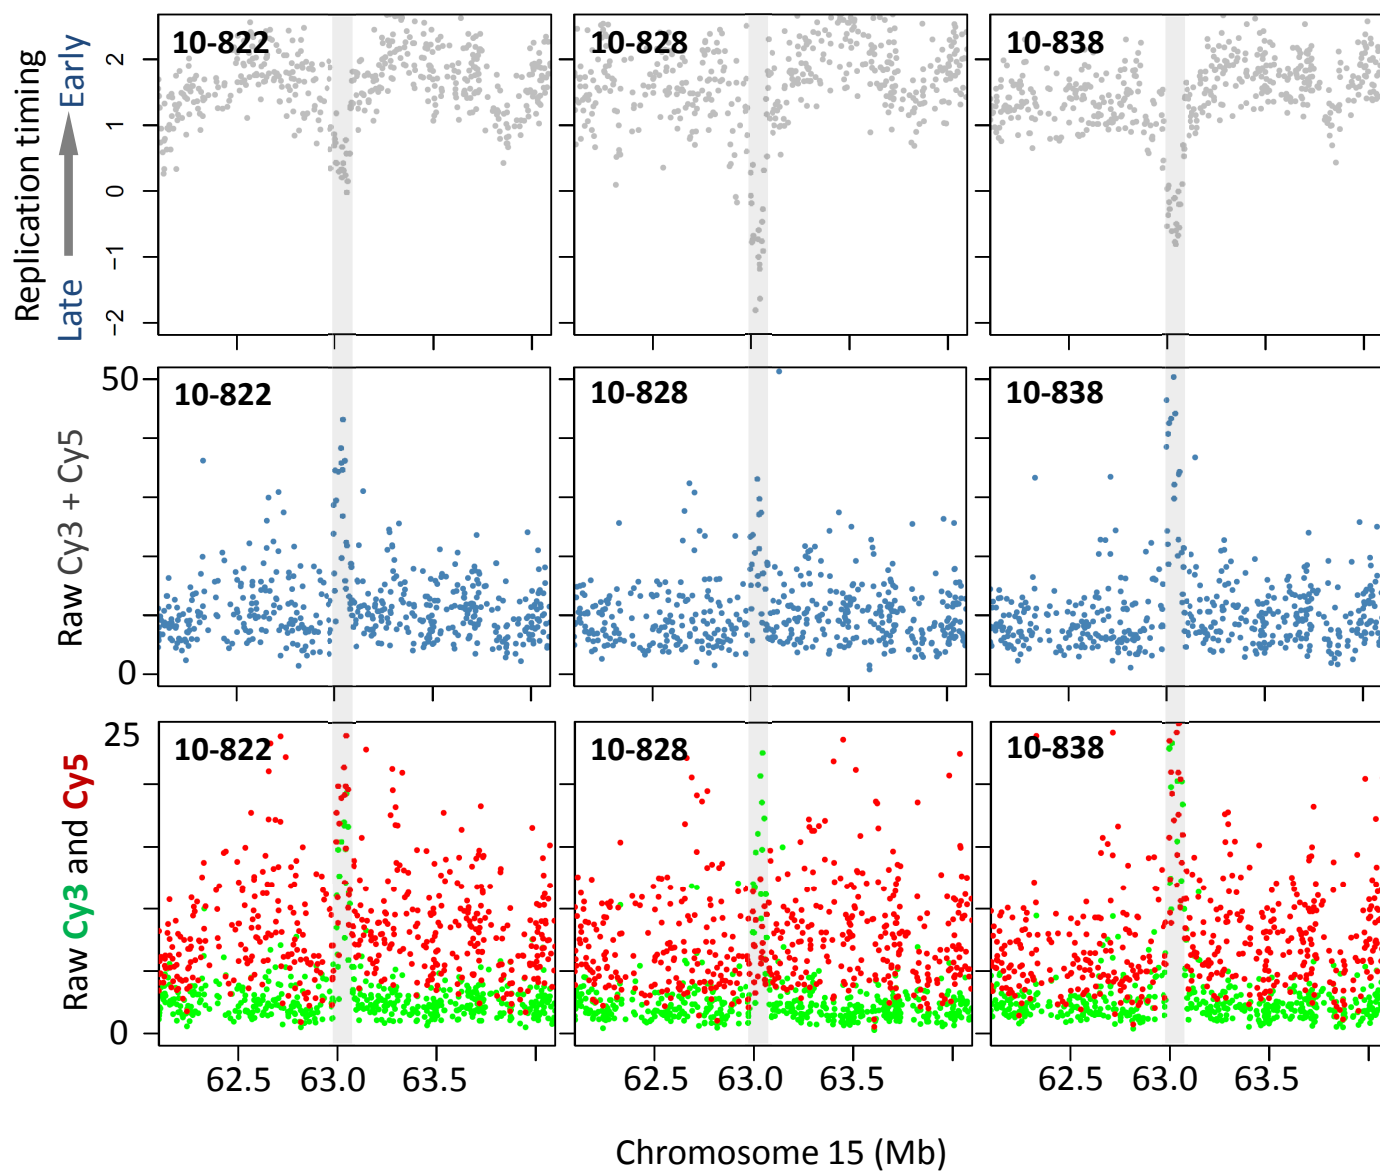

**Figure S7.** Identification of novel rearrangements in patient samples by abrupt changes in replication timing and array intensity. Novel gains of copy in patient samples 10-822, 10-828, and 10-838 are detected as a sudden increase in the floor of Cy3 and Cy5 raw intensities (bottom profiles, 62 Mb) or by both raw intensities and corresponding abrupt shifts in replication timing (63 Mb).

**A**

Patient samples

Detected ■ Not found ■

| Lab #  | Karyotype                                                                                                                                 | Gains*                                                                                        | Losses*                       | Translocations                                             |
|--------|-------------------------------------------------------------------------------------------------------------------------------------------|-----------------------------------------------------------------------------------------------|-------------------------------|------------------------------------------------------------|
| 11-220 | 55,XX,+X,+4,+6,+10,del(10)(q274),+14,+17,+18,+21,+21[18]/46,XX[2]                                                                         | chr10: 98,000,001-105,700,0001                                                                | None                          | None                                                       |
| 10-820 | 46,XX,t(9;15)(q13;p17.12)[18]/46,XX[2]                                                                                                    | None                                                                                          | None                          | chr9: 70,000,001-70,500,000 chr15: 7,900,001-14,100,0002   |
| 11-132 | 46,XX,t(12;17)(p13;q12)[16]/46,XX[4]                                                                                                      | None                                                                                          | None                          | chr12: 1-14,800,000 chr17: 28,800,001-35,400,000           |
| 11-253 | 45,XY,-20[18]/46,XY[2], including (14q32)/CRLF2 (Yp11.3)                                                                                  |                                                                                               |                               | chr14: 88,900,001-106,368,585 chrY: 1,264,869-1,281,529    |
| 10-822 | 45,Y,add(X)(p22.1),add(1)(p374),del(6)(q17.1.2q272),-9,add(12)(q272),t(17;19)(q22;p13.3)[1]/46,XY[24]                                     | chr1: 34,400,001-46,500,0003<br>chr12: 91,200,001-94,800,0004<br>chrX: 17,100,001-24,900,0006 | chr6: 63,400,001-130,400,0005 | chr17: 47,600,001-54,900,000 chr19: 1-6,900,000            |
| 10-838 | 46,XX[26]                                                                                                                                 | None                                                                                          | None                          | None                                                       |
| 11-221 | 46,XY,t(11;19)(q23;p13.3)[20]                                                                                                             | None                                                                                          | None                          | chr11: 110,000,001-120,700,000 chr19: 1-6,900,000          |
| 10-668 | 46,XY,del(9)(p13),t(9;22)(q34;q11.2)[12]/46,XY,del(9)(p13),der(9)t(9;22)(q34;q11.2),ider(22)(q10)t(9;22)(q34;q11.2)[4]/46,XY[7]           | chr9:129,300,001-140,273,2527                                                                 | chr9:32,800,001-40,200,0008   | chr9: 129,300,001-140,273,252 chr22: 16,300,001-24,300,000 |
| 10-828 | N/A                                                                                                                                       | N/A                                                                                           | N/A                           | N/A                                                        |
| 10-356 | 46,XY,t(6;9)(p23;q34),del(15)(q11.2q15)[2]/45,sl,-Y[cp4]/46,sdl1,+4[5]/47,sdl2,+13[5]/46~47,sdl2,+mar1[cp3]/48,sdl3,+mar1[1] <sup>9</sup> |                                                                                               | chr15: 18,400,001-42,700,000  | chr6:13,500,001-15,500,000 chr9:129,300,001-140,273,252    |

**B**

Cell Lines

| Name      | Karyotype                                                                                                                                                                                                                       | Gains*                                                                                     | Losses*                                                                                                                                                                                                                                                                                                                                                                                                                                                                                                                                                                                                                          | Translocations                                                                                                                                                      |
|-----------|---------------------------------------------------------------------------------------------------------------------------------------------------------------------------------------------------------------------------------|--------------------------------------------------------------------------------------------|----------------------------------------------------------------------------------------------------------------------------------------------------------------------------------------------------------------------------------------------------------------------------------------------------------------------------------------------------------------------------------------------------------------------------------------------------------------------------------------------------------------------------------------------------------------------------------------------------------------------------------|---------------------------------------------------------------------------------------------------------------------------------------------------------------------|
| REH       | 47,X,-X,del(3)(p12.3-p22.3),t(4;12)inv(12)(p13q23),t(5;12;16;21)(q31;p13;q24.3;q22),del(9)(p21.3),+der(16)(16;21)(q24.3;q22),t(18;21)(q11.2;p11.2). ish del(9)(p21.3).(q11.2;p11.2). ish del(9)(p21.3).(RP11615P15-RP11467K20-) | chr1: 72 Mb<br>chr9: 37 Mb<br>chr14 108 Mb<br>chr18: 22 Mb<br>chr18: 23 Mb<br>chr21: 35 Mb | chr1: 189 Mb<br>chr2: 90 Mb<br>chr2: 99 Mb<br>chr3: 34-61 Mb<br>chr3: 37 Mb<br>chr3: 115 Mb<br>chr4: 20 Mb<br>chr4: 97 Mb<br>chr5: 110 Mb<br>chr5: 130 Mb<br>chr5: 148 Mb<br>chr5: 180 Mb<br>chr6: 30 Mb<br>chr6: 110 Mb<br>chr7: 40 Mb<br>chr7: 145 Mb<br>chr8: 118 Mb<br>chr9: 1 Mb<br>chr9: 21-23 Mb<br>chr10: 30-36 Mb<br>chr10: 48 Mb<br>chr10: 60 Mb<br>chr12: 10 Mb<br>chr12: 90 Mb<br>chr13: 61-63 Mb<br>chr13: 76-78 Mb<br>chr13: 93 Mb<br>chr14: 22 Mb<br>chr14: 72 Mb<br>chr14: 90-93 Mb<br>chr14: 108 Mb<br>chr16: 84 Mb<br>chr17: 39-41 Mb<br>chr18: 45-46 Mb<br>chr18: 73 Mb<br>chr21: 28-30 Mb<br>chr22: 21-22 Mb | chr4:40,900,001-45,600,000 chr12:94,800,001-107,500,000<br>chr12:1-14,800,000 chr21:30,500,001-46,944,323<br>chr18:17,300,001-23,300,000 chr21:6,300,001-10,000,000 |
| RCH-ACV   | 47,XX,t(1;19)(q23;p13),del(6)(q14.1 q15),+8                                                                                                                                                                                     |                                                                                            | chr6:75,900,001-92,100,000                                                                                                                                                                                                                                                                                                                                                                                                                                                                                                                                                                                                       | chr1:154,800,001-163,800,000 chr19:1-6,900,000                                                                                                                      |
| MHH-CALL2 | 52,XX,+8,+10,+18,+18,+21,+21 [Alternative: 51,XX,+X,+18,+der(18)t(15;18)(q13.1;q22.1),+21,+21]                                                                                                                                  | chr15: 25,700,001-100,338,915<br>chr18:1-64,900,000                                        | None                                                                                                                                                                                                                                                                                                                                                                                                                                                                                                                                                                                                                             | None                                                                                                                                                                |

**Figure S8.** Detection of known karyotypic rearrangements in leukemic patient samples (A) and cell lines (B). Rearrangements detected as abrupt changes in replication timing ratios or raw array intensities as in Fig. S6 are highlighted in green, while those that did not produce abrupt shifts are highlighted red. A more detailed analysis was possible for cell line REH, for which CGH profiles are available through the Sanger CGP project (<http://www.sanger.ac.uk/cgi-bin/genetics/CGP/cghviewer/CghHome.cgi>). Whole-chromosome gains and losses were more readily detected by chromosome-wide Cy3+Cy5 (Fig.S4), so only sub-chromosomal rearrangements are examined here.



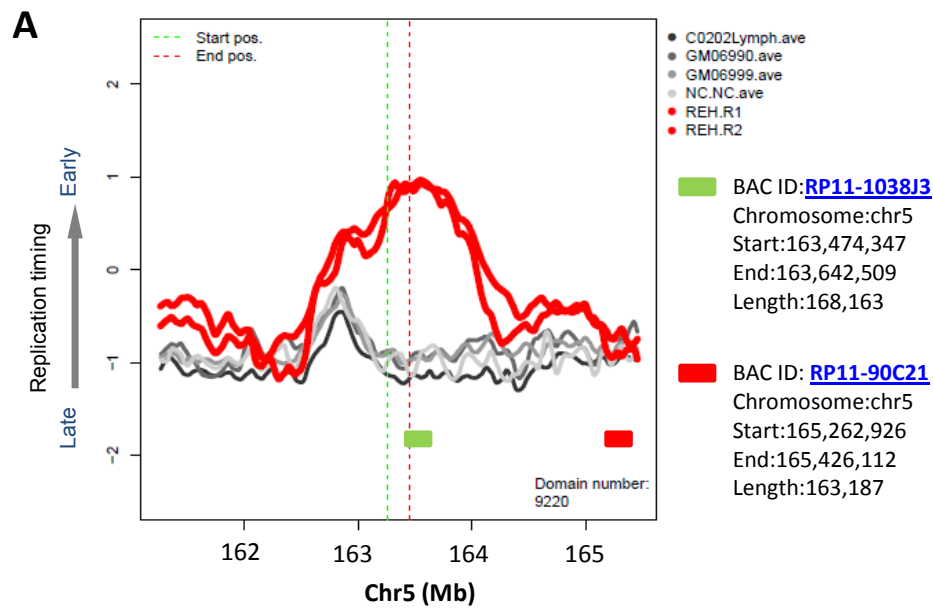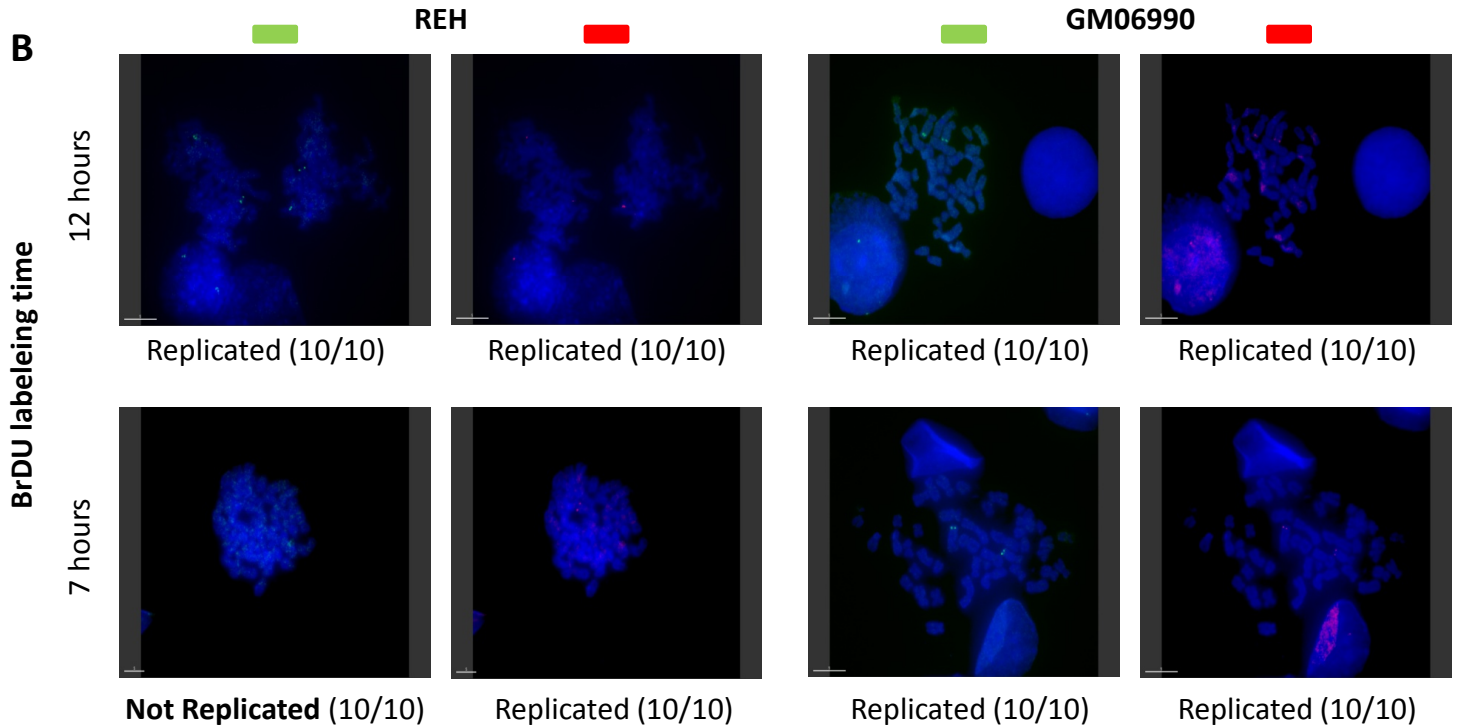

**Figure S9.** Replication Timing-Specific Hybridization (ReTiSH) to verify an REH-specific replication timing difference. (A) One of the features of the REH-specific replication timing fingerprint is illustrated along with the positions of two FISH probes shown as green and red rectangles. The BAC ID and coordinates of the probes are shown to the right of the graph. (B) ReTiSH relies on the fact that BrdU-substituted DNA is hypersensitive to breakage by UV light. Cells are labeled with BrdU for either 7 or 12 hours and metaphase spreads are prepared. Cells in metaphase will have incorporated BrdU either late (7 hour labeling) or throughout most of S (12 hour labeling). Metaphase spreads are treated with UV light to destroy BrdU-substituted DNA strands and FISH probes are hybridized without denaturation. As expected, both probes hybridize to metaphase spreads of both cell lines with a 12-hour labeling. The non-fingerprint control probe hybridizes to metaphase spreads from both cell lines with a 7-hour label, demonstrating its late replication in all cases. However, the fingerprint probe hybridized to GM06990 but not REH metaphases with a 7 hour labeling, indicating that it is replicated early in S phase. 10 metaphases were counted for each condition and 100% gave the indicated result.

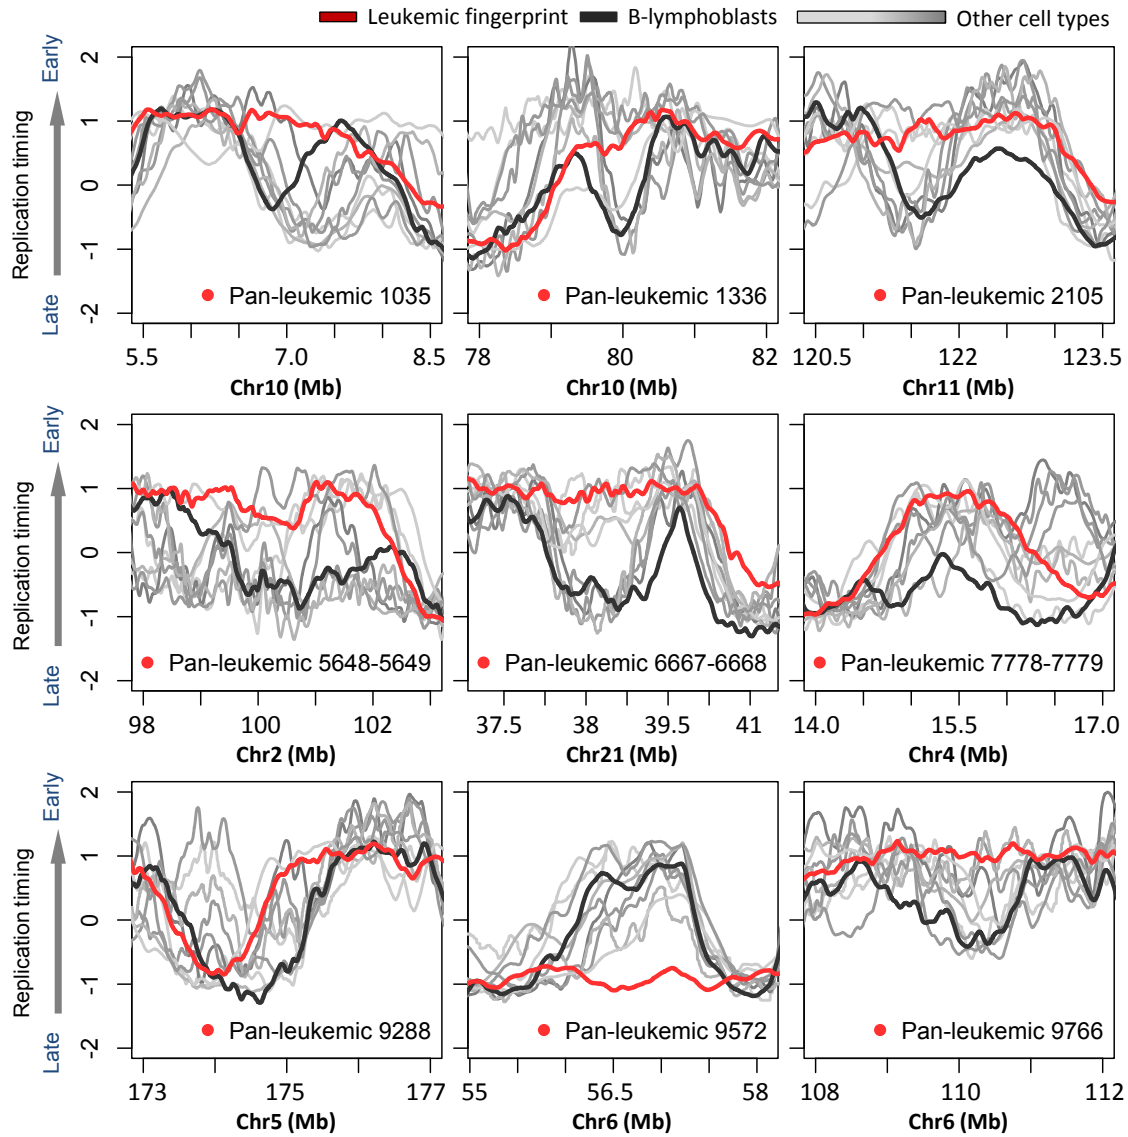

**Figure S10.** Additional developmental boundary examples. Averages of leukemic profiles (red) are examined in pan-leukemic fingerprint regions. Except for region 9572, which remains late in leukemic profiles, each region aligns to both boundaries and timing established by other cell types in development (grey), but has timing values distinct from the average profile of normal B-cells (black).
