# Supplementary material for: Abnormal developmental control of replication-timing domains in pediatric acute lymphoblastic leukemia
Source: HighWire-hosted journal article supplement (doi:10.1101/gr.138511.112), 2012-05-24
Supplement: ST2_Fingerprint_regions_and_genes.xlsx [file ST2_Fingerprint_regions_and_genes.xlsx]

## Sheet: Pan-leukemic regions
Region	CHR	Start	End	C0202Lymph.R1	C0202Lymph.R2	GM06990Lymph.R1	GM06990Lymph.R2	GM06999Lymph.R1	GM06999Lymph.R2	NC.NC.R1	NC.NC.R2	REH.R1	REH.R2	RCH.ACV.R1	RCH.ACV.R2	RCH.ACV.R3	MHHCALL2.R1	X10.356.R1	X10.668.R1	X10.770.R1	X10.770.R2	X10.771.R1	X10.771.R2	X10.799.R1	X10.820.R1	X10.822.R1	X10.822.R2	X10.822.R3	X10.828.R1	X10.838.R1	X11.015.R1	X11.015.R2	X11.064.R1	X11.064.R2	X11.118.R1	X11.118.R2	X11.132.R1	X11.132.R2	X11.220.R1	X11.221.R1	X11.253.R1
6667	chr21	38698475	38837897	-0.850219	-0.783173	-0.583779	-0.653041	-0.559255	-0.952911	-0.967277	-0.966269	1.09879	0.968955	1.14335	1.2378	1.13155	1.53418	0.912621	1.0191	1.55648	1.43599	1.32125	1.10932	1.11605	1.23388	0.897922	0.943462	0.97482	0.646943	0.961474	1.14344	0.859681	1.1693	1.18904	1.01384	1.08565	1.27618	1.24707	1.92161	1.20196	1.09005
1035	chr10	6739321	6970364	-0.4748	-0.211348	-0.282584	-0.364352	0.135896	-0.508234	-0.212429	-0.149924	0.900516	1.03443	1.0095	0.994612	1.09353	1.03268	1.22511	0.996663	2.09794	1.75848	1.74435	1.55044	1.21847	1.16488	1.18398	1.29906	1.23565	0.654204	1.19226	0.970893	0.895259	1.03655	1.05911	1.13	1.23571	1.26828	1.16891	1.45934	1.10671	1.17372
5648	chr2	101237895	101432133	-0.469477	-0.37901	-0.199532	-0.215043	-0.100399	-0.627546	0.120129	0.116276	0.755948	0.937727	0.998167	1.09285	1.08566	0.930598	1.06783	0.809414	1.00124	1.01271	1.05504	0.95623	1.13296	0.979155	0.880053	0.901559	0.863873	0.993656	0.900462	1.00718	0.710577	0.910629	0.862523	1.00169	0.964177	0.98197	0.945262	0.536576	0.658708	1.03725
6668	chr21	38837897	38973903	-1.06462	-0.873382	-0.678795	-0.736984	-0.495702	-1.02728	-1.22878	-1.00283	1.17752	1.06601	1.15482	1.19795	1.09961	1.33689	1.04283	1.04017	1.17119	0.988635	1.23884	1.14191	1.17531	0.974778	0.873698	1.08429	0.961297	0.588343	0.687434	0.901882	0.529164	0.867617	0.918	1.02199	1.00927	0.881603	0.921048	1.6567	0.540955	0.935728
9572	chr6	56228158	56427539	0.250672	0.229306	0.601655	0.538927	0.879028	0.865281	0.985199	0.626157	-0.539429	-0.938008	-0.695553	-0.702194	-0.625093	-1.13033	-1.12096	-0.962503	-0.760507	-0.596503	-1.00824	-1.0482	-1.1834	-1.01391	-1.03058	-0.968088	-1.01962	-1.2363	-0.815349	-0.604691	-0.849328	-1.12236	-1.08076	-0.967808	-0.84203	-1.13071	-1.14629	-0.837619	-1.05813	-0.998838
6650	chr21	35758661	35930405	-1.28294	-1.02214	-0.262896	-0.359529	-0.327694	-0.90079	-1.09527	-0.630149	1.11363	1.07228	1.23702	1.33894	1.06596	1.09623	1.25381	0.965235	1.56225	1.54157	0.863501	0.883644	0.865004	0.692436	0.63039	0.618248	0.665661	0.995254	0.926978	0.911315	0.984477	0.950766	1.02489	0.990951	1.07311	1.33709	1.38588	1.71299	1.40843	0.878343
9288	chr5	175044662	175223138	-0.816857	-0.795232	-0.652867	-0.772815	-0.139407	-0.697924	-0.299745	-0.556699	0.9054	1.07364	1.06068	1.22866	1.26165	0.83122	0.723676	0.746781	1.04536	0.848248	0.6484	0.965664	0.764099	1.03864	0.733608	0.691795	0.695524	1.11742	1.08802	0.891113	0.66943	1.22275	1.11561	1.13505	1.26719	1.04456	1.0419	1.18652	1.51613	1.2086
5649	chr2	101432133	101628111	-0.357762	-0.39061	-0.528981	-0.578586	-0.211724	-0.719272	0.249331	-0.175304	0.583043	0.729521	0.933561	1.17952	1.01462	0.675499	1.07025	0.788242	1.11945	0.867636	0.826213	0.903936	1.0044	0.867944	0.806789	0.954307	0.879435	0.718409	0.839154	1.00672	0.925447	1.01014	0.980185	0.99518	1.04959	1.15148	1.08835	0.823299	0.453252	0.944833
2663	chr12	114976139	115139258	-1.13871	-0.800306	0.165807	0.143347	-0.0303139	-0.685681	-0.614105	-0.774282	1.14956	1.03333	1.15694	1.16439	1.06983	1.32012	1.17633	1.17885	2.27232	2.14241	1.56858	1.38363	0.694849	1.13005	1.209	1.30462	1.30989	1.42525	1.17731	1.79453	1.17004	1.55209	1.67521	1.12372	1.26724	0.989919	1.09306	1.0675	1.12507	1.15984
10129	chr7	20443430	20708583	0.843382	0.683975	-0.237484	-0.332465	0.843995	0.232873	0.754181	0.338619	-1.03517	-1.02762	-1.23437	-1.2058	-1.17847	-0.816955	-0.437452	-1.1393	-0.516546	-0.133461	-1.00234	-0.947471	-1.03745	-1.08696	-1.10366	-1.13972	-1.16817	-1.18958	-0.981836	-0.845031	-1.24681	-1.32154	-1.38087	-1.01747	-1.04803	-0.711917	-0.767206	-0.974756	-1.01017	-1.21577
2105	chr11	121597120	121738366	-1.01546	-0.781927	-0.381187	-0.428301	0.311003	-0.24802	-0.973637	-0.719473	1.02576	0.981721	0.809721	0.948542	0.789916	0.973135	0.929526	1.0308	0.367766	0.383056	0.801537	0.576795	0.794283	0.91079	0.561308	0.645301	0.642842	0.957795	1.09794	0.815987	1.09371	1.2139	1.19137	0.867465	1.05109	0.632856	0.637869	1.02813	1.02112	0.947135
11323	chr8	133853306	134045588	-0.907096	-0.967019	-0.765457	-0.729531	-0.42795	-0.714739	-0.821532	-0.787474	0.72772	0.061017	1.39599	1.5153	1.35615	1.21181	0.98284	1.01877	0.69917	0.738723	1.40549	1.19861	1.02884	1.04069	1.11927	1.14167	1.04426	0.91761	1.02882	1.12644	0.167881	1.07127	1.11135	0.979738	1.06452	1.15871	1.03436	0.613393	0.719241	0.938911
7778	chr4	15047413	15232918	-0.791412	-0.695271	-0.308379	-0.355462	-0.169753	-0.556215	0.0210799	-0.270828	0.828197	0.866579	0.770484	0.50488	0.643456	1.08981	0.899506	1.05582	0.859769	0.950519	0.972049	0.872981	0.5077	1.03546	1.01466	1.02701	0.999693	1.01366	0.945773	0.879695	0.496659	1.1573	1.08705	0.782253	0.907616	1.12998	1.12252	0.618367	1.1133	0.991875
6649	chr21	35606314	35758661	-1.33367	-1.20638	-0.0317037	-0.110449	-0.0729671	-0.723153	-0.963579	-0.619404	1.14468	1.031	1.13893	1.09456	1.15682	1.14983	1.14956	1.04205	1.43721	1.33461	0.827688	0.865725	0.703186	0.746586	0.575766	0.577732	0.591626	0.964511	0.902774	0.787788	0.913124	1.2428	1.21071	1.05876	1.11861	1.24213	1.32555	1.7208	0.859145	0.849054
9766	chr6	109864710	110176233	-0.742533	-0.695423	-0.174351	-0.308153	0.214885	-0.0959443	0.0631812	-0.139567	0.751181	0.996112	0.937069	0.77987	1.01175	1.07039	1.39333	1.00185	2.01504	2.05124	1.25486	0.95381	0.863476	1.08041	0.982236	0.931064	0.932171	0.854865	1.11957	1.26076	0.711054	0.981082	0.837551	0.974682	0.885933	1.23043	1.18811	1.55301	1.00555	1.08092
7779	chr4	15232918	15475506	-0.506224	-0.375966	-0.0343695	-0.109238	0.0511883	-0.235977	0.351584	-0.108404	1.03546	0.946304	0.721124	0.689863	0.911034	1.09329	0.879807	0.886521	0.867035	0.99943	1.00522	0.938252	0.631324	0.821655	0.936238	0.954606	0.960019	0.87347	0.963916	1.00266	0.364956	0.617065	0.589238	0.798646	0.871874	0.98264	0.940969	0.969147	1.0038	0.928648
6651	chr21	35930405	36074077	-1.01417	-0.733848	-0.0556706	-0.14215	-0.0479594	-0.670359	-0.86774	-0.356805	1.08257	1.03207	1.32261	1.34797	1.13413	0.962125	1.18898	0.949671	1.8542	1.82533	0.787653	0.847109	0.963764	0.753514	0.626402	0.75044	0.681668	0.900447	0.904134	1.1184	0.969241	1.07579	1.14192	0.97653	0.995263	1.2945	1.33951	1.75605	1.51626	1.0313
11053	chr8	73167064	73441385	-0.210275	-0.234505	0.0989387	0.0431099	0.392668	0.0206534	0.0391086	0.14492	-0.825207	-0.980771	-1.05765	-1.12072	-1.05962	-0.900297	-0.770009	-1.01743	-0.848058	-1.24148	-1.57012	-1.61528	-1.40524	-0.880581	-1.12849	-1.36135	-1.20726	-1.17558	-0.689603	-0.811545	-1.17055	-1.08233	-1.07165	-1.06946	-1.06104	-0.885215	-0.961465	-0.918141	-1.0689	-1.20218
8309	chr4	141172526	141317765	-0.812256	-0.7582	-0.52013	-0.579456	-0.49026	-0.707196	-0.649674	-0.492649	0.505617	0.605268	1.10885	1.30749	1.1031	1.09238	1.27732	0.855456	0.853834	0.920688	0.612767	0.567715	0.893126	1.14419	0.550762	0.641965	0.586529	0.683228	1.07952	0.923137	0.609241	0.905136	0.943068	1.30852	1.41542	1.03623	1.01338	1.3347	0.668701	1.04095
1336	chr10	80135967	80294445	-0.217858	-0.00252659	-0.227352	-0.329678	0.134748	-0.545317	-0.324559	-0.310397	0.815623	0.898426	1.08196	1.33491	1.1282	0.823633	1.22961	1.01816	1.09872	1.18815	0.959823	1.12852	0.949735	1.18909	0.996781	1.0452	0.979862	0.877623	1.2915	1.17196	1.21035	1.4364	1.42621	1.16772	1.08564	0.944829	0.933198	0.987842	1.01534	1.17891

## Sheet: Pan-leukemic genes
Region	Gene	Strand	CHR	txStart	txEnd
5648	SMPD2	-	chr2	101255829	101255943
5648	RNF149	-	chr2	101258984	101291584
5648	CREG2	-	chr2	101331656	101370489
11323	PHF20L1	+	chr8	133856785	133894621
7778	CC2D2A	+	chr4	15080586	15212278
9766	SMPD2	+	chr6	109868623	109871815
9766	MICAL1	-	chr6	109871960	109883883
9766	ZBTB24	-	chr6	109890411	109911133
9766	C6orf224	-	chr6	109920756	109934386
9766	FLJ42177	-	chr6	109955524	109978433
9766	C6orf199	-	chr6	110059592	110119108
7779	BST1	+	chr4	15313670	15342894
7779	CD38	+	chr4	15389028	15459804

## Sheet: T-cell regions
Region	CHR	Start	End	C0202Lymph.R1	C0202Lymph.R2	GM06990Lymph.R1	GM06990Lymph.R2	GM06999Lymph.R1	GM06999Lymph.R2	NC.NC.R1	NC.NC.R2	REH.R1	REH.R2	RCH.ACV.R1	RCH.ACV.R2	RCH.ACV.R3	MHHCALL2.R1	X10.356.R1	X10.668.R1	X10.770.R1	X10.770.R2	X10.771.R1	X10.771.R2	X10.799.R1	X10.820.R1	X10.822.R1	X10.822.R2	X10.822.R3	X10.828.R1	X10.838.R1	X11.015.R1	X11.015.R2	X11.064.R1	X11.064.R2	X11.118.R1	X11.118.R2	X11.132.R1	X11.132.R2	X11.220.R1	X11.221.R1	X11.253.R1
3538	chr14	97366653	97520693	-1.26258	-1.35682	-0.321306	-0.433565	-0.813242	-1.09303	0.652814	-0.239516	-1.39956	-1.17539	-0.610844	-0.600675	-0.578385	-1.2024	-0.746561	-1.13247	-2.73725	-2.4171	-1.81329	-1.57946	1.16226	-1.101	-1.42294	-1.70446	-1.5357	0.617028	-1.08032	-1.24517	-0.986589	-0.673887	-0.798023	0.390088	0.379633	-0.719251	-0.730566	-0.483814	-1.03061	-1.19412
3539	chr14	97520693	97674740	-1.20581	-1.35363	-0.501534	-0.517106	-0.953725	-1.08146	0.494658	-0.336406	-1.13276	-0.905997	-0.538621	-0.443681	-0.475697	-1.13578	-0.620601	-0.968311	-2.68252	-2.56659	-1.84856	-1.7821	1.31199	-1.03359	-1.41362	-1.58489	-1.42435	0.487078	-1.10141	-1.05905	-0.938466	-0.562717	-0.657514	0.236408	0.280983	-0.440841	-0.43713	-0.856038	-0.891162	-1.16235
3542	chr14	98002999	98166643	-1.22901	-1.31871	-0.65504	-0.789249	-0.960016	-1.14014	-0.513112	-0.643441	-1.33155	-1.03987	-0.321341	-0.16145	-0.324223	-1.10216	-0.307403	-1.18197	-1.82271	-1.6518	-1.5345	-1.43388	1.15848	-1.10195	-1.13337	-1.23722	-1.1676	0.44698	-1.01828	-1.32229	-1.17307	-0.477483	-0.53691	0.353816	0.388289	-0.685162	-0.715028	-0.759368	-1.08373	-1.22371
3537	chr14	97169580	97366653	-1.27206	-1.3546	-0.263232	-0.313122	-0.730586	-1.02843	0.940184	-0.300708	-1.27738	-1.20552	-0.651346	-0.578219	-0.595862	-1.1131	-0.532745	-1.04818	-2.12866	-2.03565	-1.47282	-1.12638	1.24503	-1.04599	-1.32405	-1.67088	-1.5485	0.663084	-0.983963	-1.13974	-0.568881	-0.875565	-0.88548	0.580202	0.551339	-0.922863	-0.9349	0.166016	-1.11799	-1.18464
3536	chr14	97032024	97169580	-1.40678	-1.45768	-0.223899	-0.247335	-0.697061	-1.09992	0.618859	-0.425024	-1.27479	-1.16848	-0.476623	-0.527151	-0.530706	-1.04271	-0.317264	-1.12174	-1.39973	-1.55199	-1.12952	-0.843953	1.17397	-1.19181	-1.1986	-1.50879	-1.36506	0.799926	-0.932189	-0.629584	-0.175207	-0.662189	-0.573589	0.510866	0.639331	-0.962652	-0.974618	0.568907	-1.2683	-1.14906
3540	chr14	97674740	97803906	-1.13152	-1.34385	-0.613085	-0.674422	-0.906827	-1.05721	0.417487	-0.362284	-0.983344	-0.604086	-0.53059	-0.358229	-0.46669	-1.13706	-0.416145	-1.028	-2.36666	-2.55113	-1.72024	-1.66735	1.13498	-1.10636	-1.41091	-1.57154	-1.39938	0.0993331	-1.13192	-1.07283	-0.769433	-0.425626	-0.47413	0.234474	0.300788	-0.287958	-0.268853	-0.95387	-1.03274	-1.22148
3543	chr14	98166643	98311935	-1.26294	-1.36022	-0.869946	-0.904462	-0.953758	-1.08493	-0.43997	-0.786954	-1.24213	-0.746132	-0.0758028	0.125979	-0.0390047	-1.11598	-0.355062	-1.09586	-1.89329	-2.00447	-1.34492	-1.43174	1.11417	-1.02249	-0.741918	-1.08938	-0.815169	0.0618199	-0.695001	-1.56602	-0.976496	-0.312663	-0.365529	0.266718	0.266848	-0.741299	-0.733891	-0.420693	-1.14023	-1.13833
6522	chr20	55075268	55256164	-0.304138	0.284607	0.861971	0.82703	1.15817	0.635327	-0.159776	0.459114	1.23304	1.08988	1.08657	1.22479	1.06411	1.31938	1.03637	0.948304	1.02192	1.08542	1.26829	1.48297	-0.565726	1.31507	1.19908	1.21942	1.19179	-0.00345499	0.955322	2.552	2.79519	1.19814	1.30909	1.30226	1.25814	1.22454	1.26997	0.0704349	1.59368	1.06296
6342	chr20	12892176	13087496	-1.08815	-0.897823	-0.77984	-0.806908	-0.53986	-1.07207	-0.791868	-0.614863	-0.892936	-0.74644	-0.160201	-0.0434069	-0.0568538	-0.646484	-0.863267	-1.16957	-1.55284	-1.62072	-0.975204	-1.2329	0.834757	-1.15324	-1.01204	-1.02615	-0.996461	0.618301	-1.09626	-0.404645	-0.525523	-0.575177	-0.561081	-1.16265	-1.19283	-1.01723	-1.06418	-1.19169	-1.07028	-0.836781
3544	chr14	98311935	98479479	-1.34331	-1.53328	-0.982649	-1.06571	-0.977501	-1.20152	-0.579672	-0.963197	-0.933975	-0.402087	0.368065	0.490558	0.370622	-0.905429	-0.248864	-1.13959	-1.97127	-2.04856	-1.31737	-1.30831	1.03549	-0.946254	-0.913352	-1.17726	-0.983977	0.603172	-0.719804	-1.53758	-1.00387	0.30467	0.250044	0.400387	0.382252	-0.560043	-0.527535	-0.137528	-0.762505	-1.1598
10977	chr8	56598722	56854215	0.810443	0.764064	0.881145	0.876714	1.02395	0.71967	0.720209	0.81148	0.110739	0.0851662	0.962315	1.42049	1.08597	0.61198	0.877606	0.603473	0.559549	0.311641	0.12497	0.0592448	-1.19809	0.8157	0.38977	0.39842	0.414167	-0.789615	0.114914	-0.0546188	0.0620339	1.24192	1.17093	-0.0859267	-0.10046	0.923099	0.944915	0.03526	0.1346	0.408555
6521	chr20	54905526	55075268	-0.711238	-0.173413	0.257275	0.110847	0.577449	-0.088189	-0.749548	-0.12746	1.00783	0.989189	1.18617	1.18252	1.15346	0.932703	0.798879	0.900431	0.585261	0.525818	1.10621	1.21943	-0.509572	1.08375	0.98415	0.978487	0.935898	-0.270498	0.638979	1.87894	2.64324	1.12161	1.155	1.20266	1.17395	0.861726	0.915686	0.278536	1.91164	0.775146
4873	chr18	54015745	54205193	1.03711	1.21137	1.23255	1.24791	1.27642	1.00869	1.19288	1.12995	0.521983	0.302469	0.933872	1.11393	1.15327	0.7038	-0.806017	0.520143	0.215621	0.159336	-0.430472	-0.352141	-1.02228	0.126125	-1.193	-1.39694	-1.25139	-0.590592	0.106788	0.312889	0.905733	0.846344	0.75348	0.576835	0.569244	0.581853	0.59516	1.05452	1.20839	0.495087
8944	chr5	110281764	110513634	0.142251	-0.0364882	0.664143	0.702637	0.73726	0.448077	0.955532	0.720899	-1.0644	-0.922259	-0.855953	-0.936947	-0.79607	-1.12686	-0.85388	-0.910937	-0.884476	-0.921001	-1.1342	-1.2816	0.568176	-1.01675	-0.959103	-0.903623	-0.872609	0.140615	-0.985585	-1.29681	-1.55611	-0.630268	-0.548977	-1.12385	-1.08447	-0.928595	-0.928949	-0.749627	-1.14273	-1.08193
8945	chr5	110513634	110683631	0.486833	0.293827	0.875059	0.820824	0.775769	0.821074	1.08934	1.00479	-0.957621	-0.700255	-0.893048	-0.908665	-0.907951	-0.897825	-0.870739	-0.689193	-0.93392	-0.731734	-1.36737	-1.27352	0.741892	-0.828915	-1.05058	-1.03268	-1.00158	0.272949	-0.890247	-1.11172	-1.41715	-0.739029	-0.616549	-1.03643	-1.07194	-0.889169	-0.89578	-0.927591	-1.05131	-0.964595
3541	chr14	97803906	98002999	-1.18304	-1.29898	-0.449695	-0.581905	-0.923217	-0.942182	-0.144393	-0.401208	-1.17215	-0.849965	-0.457887	-0.437539	-0.476848	-1.11459	-0.323405	-1.03768	-1.7125	-1.73165	-1.3786	-1.24439	0.922856	-0.976174	-0.929214	-1.13428	-0.949499	-0.211998	-0.995718	-1.29477	-1.01804	-0.28351	-0.304196	0.287242	0.345682	-0.426999	-0.420116	-0.768558	-1.09149	-1.14069
2169	chr11	133288645	133459179	-1.00807	-1.20936	-0.273668	-0.347097	-0.226331	-0.404606	-1.14752	-0.655873	-1.01081	-0.97748	1.10169	1.0489	1.07541	-1.06524	-0.376252	-0.983819	-2.82255	-2.60337	-2.21368	-1.81266	0.679927	-0.722439	-1.53784	-1.61421	-1.51028	-0.683314	-1.12521	-1.62431	-0.571731	-1.12395	-1.08207	-1.10953	-1.20784	-0.890899	-0.941102	-1.29274	-0.46537	-1.22055
708	chr1	181264320	181439500	0.715175	0.859259	0.9386	0.87382	1.0334	0.547609	1.26403	0.698217	1.1111	0.928762	1.10779	1.0843	1.10173	1.11115	0.530722	0.701101	1.30996	1.26466	0.967382	1.03735	-0.923177	0.934965	0.832075	0.931288	0.868903	-0.229446	0.851502	1.11728	1.05478	0.96597	0.98504	0.551064	0.581428	0.741361	0.809771	1.17398	1.89724	0.875012
4876	chr18	54566452	54815018	0.876481	1.08541	1.14614	1.16452	1.14225	1.01313	1.22216	0.979404	0.609885	0.306067	0.981321	1.13554	1.10905	0.589676	-0.794192	0.597979	-1.05738	-1.18722	-1.2593	-1.34532	-1.18448	0.41579	-0.954955	-0.987369	-1.05039	-0.765893	0.111062	0.62081	0.863438	1.07302	1.11498	0.49577	0.510234	0.305641	0.287321	0.876797	0.75505	0.586596
4874	chr18	54205193	54378900	1.07724	1.16779	1.09875	1.13089	0.993674	1.12061	1.0281	0.96611	1.05808	0.686452	1.29323	1.31122	1.31064	0.980544	-0.749669	0.666751	0.459359	0.324323	-0.783157	-0.655354	-0.815794	0.623374	-1.01463	-1.26514	-1.12184	-0.707202	0.464605	0.708623	1.01799	0.858987	0.78354	0.498856	0.577705	0.787025	0.814306	1.22038	0.79422	0.841597

## Sheet: T-cell genes
Region	Gene	Strand	CHR	txStart	txEnd
3538	SYCP1	+	chr1	115198977	115339513
3539	TSHB	+	chr1	115373937	115378464
3542	HSD17B6	+	chr12	55443374	55467841
3537	SDR-O	-	chr12	55603883	55614312
3536	RDH16	-	chr12	55631482	55637685
3540	GPR182	+	chr12	55674621	55676736
3543	ZBTB39	-	chr12	55678884	55686497
6522	DHX15	-	chr4	24138185	24195282
6342	CYP26B1	-	chr2	72209874	72228471
3544	ABCB1	-	chr7	86970883	87180500
10977	NDNL2	-	chr15	27347649	27349309
6521	GPR156	-	chr3	121368568	121445635
4873	LRRC58	-	chr3	121526265	121550876
8944	TAC1	+	chr7	97199206	97207720
8945	ASNS	-	chr7	97319376	97339413
3541	MGC72080	-	chr7	97433843	97439574
2169	OCM2	-	chr7	97451948	97457352
708	FAM92A3	+	chr4	184195811	184198266
4876	C4orf38	-	chr4	184255167	184257346
4874	POFUT2	-	chr21	45508270	45532239

## Sheet: AML regions
Region	CHR	Start	End	C0202Lymph.R1	C0202Lymph.R2	GM06990Lymph.R1	GM06990Lymph.R2	GM06999Lymph.R1	GM06999Lymph.R2	NC.NC.R1	NC.NC.R2	REH.R1	REH.R2	RCH.ACV.R1	RCH.ACV.R2	RCH.ACV.R3	MHHCALL2.R1	X10.356.R1	X10.668.R1	X10.770.R1	X10.770.R2	X10.771.R1	X10.771.R2	X10.799.R1	X10.799.R2	X10.820.R1	X10.822.R1	X10.822.R2	X10.822.R3	X10.828.R1	X10.838.R1	X11.015.R1	X11.015.R2	X11.064.R1	X11.064.R2	X11.118.R1	X11.118.R2	X11.132.R1	X11.132.R2	X11.220.R1	X11.221.R1	X11.253.R1
8024	chr4	74855957	75107409	-0.401353	-0.253584	-0.623987	-0.667496	-0.377949	-0.923617	-0.690544	-0.772903	-0.712828	0.0276316	-1.11232	-1.13504	-1.0172	-1.1029	1.12018	-0.964246	-0.156028	-0.876556	-0.812034	-0.242747	-0.466818	-0.192377	-1.043	0.352758	0.467414	0.458018	-1.06909	-1.05503	-0.721702	-1.31394	-0.998177	-1.00899	-0.693941	-0.815191	-0.401619	-0.508021	-1.05137	-0.680335	-1.02981
9934	chr6	146836760	147014892	-1.17253	-1.32469	-1.18312	-1.09468	-0.981052	-1.07586	-1.42297	-1.08207	-0.670372	-1.02326	-1.16519	-1.22872	-1.12205	-1.14114	0.823296	-1.04316	-0.891996	-0.582774	-0.835352	-0.488724	-0.481019	-1.42914	-1.03815	-0.0732779	-0.112944	-0.0703832	-0.277781	-1.05792	-0.721033	-0.958473	-0.869839	-0.934576	-0.921046	-0.935624	-0.826577	-0.891564	-0.733835	-1.03316	-1.04211
8025	chr4	75107409	75318274	-0.539453	-0.358001	-0.450581	-0.513564	-0.369309	-0.53978	-0.694552	-0.715868	-0.513077	0.146488	-0.967581	-1.21116	-1.13964	-1.0736	1.03944	-0.75214	-0.179292	-0.632643	-0.542434	-0.771617	-0.777281	-0.468502	-0.985965	0.0603174	0.118176	0.0561683	-0.966811	-1.02852	-1.20024	-1.36701	-1.12931	-1.00478	-0.851394	-0.85336	-0.350491	-0.405888	-1.24791	-0.85289	-0.936697
11258	chr8	121266475	121485449	-0.862371	-0.773146	-1.08282	-1.03952	-0.862597	-1.08783	-1.20847	-0.71067	-0.0437063	-1.11733	-0.97655	-0.809072	-0.545978	-0.0529752	1.09003	-1.1065	0.297028	-0.240094	-0.243446	-0.665354	-0.599462	-1.00675	-0.473733	-0.138511	-0.178691	-0.113082	0.0509341	-1.3082	-0.871631	-1.14273	-0.394488	-0.341673	-0.750163	-0.718446	0.454889	0.348751	-1.00019	-0.0649724	-0.972602
9935	chr6	147014892	147251089	-1.17096	-1.26885	-1.2073	-1.19981	-0.859476	-1.10069	-1.00428	-1.06665	-0.295057	-0.983522	-1.05912	-1.15563	-1.10459	-1.08103	0.923964	-0.950926	-0.104386	-0.140616	-0.220622	-0.42634	-0.299034	-1.2542	-1.04472	0.332526	0.315426	0.395808	-0.079058	-1.18747	-0.499991	-0.620021	-0.793913	-0.636623	-0.845061	-0.842343	-0.67011	-0.702568	-0.566893	-0.809783	-0.981806
11262	chr8	122076497	122343199	-0.952847	-0.856707	-1.06161	-1.00543	-0.982567	-0.941268	-1.20843	-1.12472	0.216079	-1.01944	-0.799886	-0.6431	-0.611996	0.548659	1.06447	-1.07296	0.22114	-0.387359	-0.401149	-0.446632	-0.514077	-1.06256	-0.514579	0.290325	0.368412	0.363032	-0.556643	-1.22422	-0.775604	-1.19974	-0.445094	-0.474741	-0.728373	-0.708179	0.441245	0.422199	-1.08618	-0.142199	-0.94492
9933	chr6	146653077	146836760	-1.16805	-1.42819	-1.06044	-1.1343	-0.781791	-1.14267	-1.34888	-0.991065	-0.755795	-1.08838	-1.31432	-1.2275	-1.11196	-1.06247	0.598088	-1.09996	-1.16934	-0.960901	-1.10057	-0.817549	-0.744188	-1.39146	-1.09922	-0.62375	-0.939559	-0.667454	-0.512598	-1.04496	-0.650132	-1.44889	-0.731143	-0.770883	-1.06436	-1.16258	-0.824585	-0.880166	-0.902104	-1.19895	-1.18538
10160	chr7	26555879	26758679	-0.411901	-0.164299	-0.187422	-0.26228	0.0291613	-0.483199	-0.542303	-0.347245	0.222263	0.334292	0.594315	0.60234	0.735536	-0.689132	1.26305	-1.10006	0.111048	-0.372259	-0.624892	-0.985923	-1.12695	0.638778	-1.21108	-0.81504	-0.9304	-0.755377	-1.06783	-1.13589	-0.598643	-0.638313	0.925157	1.00508	-0.199895	-0.140078	-0.778653	-0.833571	-1.16736	-0.389619	-1.00479
9936	chr6	147251089	147419057	-1.27476	-1.49946	-1.25009	-1.28498	-0.876767	-1.16131	-1.12573	-1.11571	-0.14141	-1.04437	-1.11437	-1.10783	-1.10022	-0.911504	0.903086	-0.977912	-0.111341	0.0661287	-0.167248	-0.339159	-0.0150221	-1.23228	-0.9832	0.428336	0.588602	0.576783	0.110004	-1.22839	-0.307843	-0.761148	-0.613407	-0.369143	-0.898139	-0.936072	-0.785411	-0.781449	-0.974559	-0.68684	-1.07181
8023	chr4	74674505	74855957	0.0293112	0.200582	-0.529121	-0.533991	-0.392953	-0.772816	-0.280484	-0.488544	-0.735338	-0.0262478	-1.11487	-1.1073	-0.986709	-1.14859	0.991873	-0.976523	-0.621683	-0.804183	-0.719062	-0.186228	-0.464464	-0.0963581	-0.943039	0.437441	0.513534	0.452689	-0.939492	-0.987249	-1.03031	-1.30087	-1.09405	-0.985397	-0.674495	-0.726043	-0.449821	-0.519028	-0.588748	-1.01908	-0.977675
11263	chr8	122343199	122580902	-1.1103	-1.16594	-1.03232	-1.07269	-1.04132	-0.836429	-1.25994	-1.10424	-0.481818	-1.02213	-1.21458	-0.993035	-0.980511	-0.0169969	0.83233	-1.12139	0.0577598	-0.577862	-0.628057	-0.566133	-0.458008	-0.882179	-0.827602	-0.16396	-0.264281	-0.187499	-0.853929	-1.02462	-1.10276	-1.02394	-0.638085	-0.564485	-0.714381	-0.730764	-0.0635125	-0.111099	-1.00127	-0.316024	-1.14257
8184	chr4	110191815	110406998	-0.777135	-0.707862	-0.553079	-0.522815	-0.424777	-0.724211	-0.832808	-0.43657	0.0888471	0.311339	0.592503	0.687506	0.67753	0.874488	-1.1017	0.961462	0.84977	2.39092	2.03223	0.420819	0.379136	0.562955	0.509873	-0.348828	-0.249371	-0.293874	1.12325	0.876628	0.832173	0.641375	1.25295	1.25419	0.654319	0.653329	0.548875	0.530571	1.08774	2.19882	0.929923
8026	chr4	75318274	75557066	-0.464053	-0.278447	-0.408677	-0.363507	-0.235336	-0.507519	-0.9417	-0.654125	-0.437188	-0.230095	-1.06998	-1.27543	-0.967336	-1.02478	0.838802	-0.773654	-0.497873	-0.0133867	0.0877682	-0.600802	-0.704849	-0.726439	-1.12529	-0.577899	-0.679703	-0.587385	-0.890111	-1.1942	-1.22403	-1.313	-0.906232	-0.862004	-0.880845	-0.913838	-0.65596	-0.721524	-1.40845	-0.696881	-0.981577
7462	chr3	140718699	140877883	-1.11657	-1.20671	-1.05197	-1.04907	-0.547066	-1.06874	-1.19156	-1.03784	-0.638345	-0.959311	-0.840622	-0.968434	-0.892048	-1.29658	0.701665	-1.17369	0.225967	-1.67683	-1.87779	-0.109676	-0.253359	-1.03342	-1.16316	-0.124851	-0.180637	-0.102309	0.233566	-1.29825	-0.544515	-0.987726	-0.982041	-0.866561	-0.88903	-0.798434	-0.276442	-0.353416	-1.44036	-1.05462	-1.16962
7463	chr3	140877883	141068347	-1.15944	-1.29122	-1.21136	-1.21575	-0.626638	-1.16992	-1.0966	-1.04475	-0.856013	-1.16815	-0.99547	-1.00051	-1.0977	-1.21589	0.507895	-1.16327	-0.167222	-1.88365	-1.97452	-0.703006	-0.751917	-1.08652	-1.16807	-0.696771	-0.902546	-0.817406	-0.0417179	-1.40108	-0.417496	-0.803085	-1.25376	-1.21446	-1.05173	-1.04337	-0.658027	-0.726563	-1.52742	-1.14802	-1.19968
2428	chr12	64237982	64376000	-1.26204	-1.23132	-0.316545	-0.353589	-0.411223	-0.99602	0.377453	0.353904	-0.539075	-0.940099	-0.550483	-0.530492	-0.57872	0.398518	1.00144	-0.941435	0.0177648	-0.541262	-0.26949	-0.126245	-0.146292	-0.883783	-1.02558	-0.126176	-0.191215	-0.0971909	-0.880419	-1.01042	-0.6633	-0.78223	-0.489212	-0.484802	-0.572236	-0.679579	-0.616694	-0.67406	-0.340039	-0.440073	-1.07199
11259	chr8	121485449	121716027	-0.716637	-0.541048	-1.03438	-1.04269	-0.736963	-1.02751	-1.14798	-0.906502	0.493505	-1.05541	-0.726864	-0.685588	-0.47498	0.583917	1.07318	-1.01858	1.08192	-0.435703	-0.494013	-0.527963	-0.347861	-1.16038	-0.203285	0.543244	0.613081	0.584022	0.069997	-1.29057	-1.01801	-1.27501	-0.111946	-0.0918709	-0.698481	-0.583836	0.624958	0.577891	-1.14804	0.138702	-0.936438
9133	chr5	147590069	147782047	-1.09083	-1.20715	-1.08046	-1.11916	-0.691498	-0.952362	-1.12328	-0.35342	-0.396632	-0.867234	-0.54559	-0.521878	-0.520834	-0.979821	0.938226	-1.01867	-0.483484	-0.322113	-0.560149	-0.193565	-0.35092	-1.20175	-0.235474	-0.0523468	-0.0802476	-0.0667385	-0.583095	-0.336025	-1.13477	-1.04729	0.523322	0.498718	-0.0145658	-0.028095	-0.591782	-0.653347	-1.04055	1.07041	-0.902792
9937	chr6	147419057	147611346	-1.18234	-1.30122	-1.06304	-1.11226	-0.825247	-1.00437	-1.14259	-0.972125	-0.193803	-0.926155	-1.11007	-0.911892	-1.02185	-0.915954	0.721756	-1.11084	-0.319313	-0.537976	-0.57886	-0.636624	-0.418573	-1.33863	-0.854907	0.307556	0.395909	0.440303	0.167353	-1.08625	-0.662874	-1.06076	-0.653949	-0.573512	-0.908333	-0.930957	-1.02536	-0.984255	-1.12029	-0.690842	-1.02234
9134	chr5	147782047	147944929	-0.930078	-1.05476	-0.897699	-0.983823	-0.48635	-0.752684	-1.09521	-0.394267	-0.214663	-0.650903	-0.386253	-0.304199	-0.23014	-0.936914	1.10656	-0.893761	-0.0543654	-0.0545839	-0.383229	0.175444	0.212744	-1.18859	0.0813301	0.133115	0.222195	0.180568	-0.611389	0.0381394	-1.01833	-0.802445	0.553885	0.465109	0.236389	0.197265	-0.446777	-0.488893	-0.692906	0.180693	-0.781111

## Sheet: AML genes
Region	Gene	Strand	CHR	txStart	txEnd
8024	CXCL6	+	chr4	74921136	74923341
8024	PF4V1	+	chr4	74937876	74939062
8024	CXCL1	+	chr4	74953972	74955817
8024	PF4	-	chr4	75065659	75066579
8024	PPBP	-	chr4	75071619	75072764
8024	CXCL5	-	chr4	75080222	75083280
9934	RAB32	+	chr6	146906520	146917779

## Sheet: TCF3-PBX1 regions
Region	CHR	Start	End	C0202.R1	C0202.R2	GM06990.R1	GM06990.R2	GM06999.R1	GM06999.R2	NC.NC.R1	NC.NC.R2	REH.R1	REH.R2	RCH.ACV.R1	RCH.ACV.R2	RCH.ACV.R3	MHH.CALL2.R1	X10.356.R1	X10.668.R1	X10.770.R1	X10.770.R2	X10.771.R1	X10.771.R2	X10.799.R1	X10.820.R1	X10.822.R1	X10.822.R2	X10.822.R3	X10.828.R1	X10.838.R1	X11.015.R1	X11.015.R2	X11.064.R1	X11.064.R2	X11.118.R1	X11.118.R2	X11.132.R1	X11.132.R2	X11.220.R1	X11.221.R1	X11.253.R1
290	chr1	64251258	64459048	-1.07134	-1.08283	-0.998878	-1.00902	-0.742478	-1.06134	-1.35451	-1.0677	-0.8921	-0.680319	0.920914	0.721188	0.954025	-1.0521	-0.591322	-0.269312	-3.13249	-2.62911	-2.13994	-1.81956	-0.952494	-1.06431	-0.754172	-1.11289	-0.849905	-0.82648	-1.28239	-1.26862	-1.10766	1.39557	1.46568	-0.785103	-0.83706	-1.05745	-1.11721	-1.65178	-0.972262	-1.10809
1545	chr10	123847744	123999806	-0.960681	-1.20133	-0.602072	-0.638873	-0.075912	-0.362907	-1.13764	-0.762374	-0.808274	-0.436781	1.14882	1.3192	1.20679	-1.1035	-0.307644	-1.06963	-3.06597	-2.68092	-1.55552	-1.39675	-0.860732	-0.794961	-0.428272	-0.809405	-0.629036	-0.936359	-0.792563	-1.73333	-0.707797	1.42536	1.28312	-0.808482	-0.953496	-0.439734	-0.500596	-1.59071	-0.0377777	-1.01438
289	chr1	64114611	64251258	-1.00734	-1.0783	-0.907422	-0.919085	-0.691689	-1.07579	-1.00921	-1.0773	-0.690815	-0.660474	0.885525	0.90102	0.854025	-0.961925	-0.670583	-0.408894	-2.88833	-2.59811	-2.33494	-2.16243	-0.786875	-1.02081	-0.811038	-0.921671	-0.858564	-1.10526	-1.33622	-1.05617	-1.37555	1.18333	1.28162	-0.941043	-0.968468	-0.947007	-0.985773	-1.8202	-0.95285	-1.1222
6255	chr2	236008450	236215279	-0.938003	-1.00981	-0.872028	-1.05141	-0.780753	-1.13605	-1.46145	-0.923616	-0.922304	-0.759055	0.939916	1.05656	1.10363	-0.266758	-0.765761	-0.494806	-4.01445	-4.01095	-0.945113	-0.688429	-0.530191	0.138072	-0.730903	-0.688092	-0.752411	-0.113739	-1.30635	-1.3517	-1.03804	1.19687	1.10627	-0.513117	-0.457821	-1.04854	-1.02926	-1.93098	-0.0985079	-1.08969
1587	chr10	131903189	132113594	-1.18168	-1.41448	-1.06028	-1.22293	-0.694212	-1.204	-1.31373	-1.22326	-1.07695	-0.942504	0.946093	0.971715	0.960064	-1.07764	-0.894201	-1.18602	-2.3858	-2.34443	-1.75032	-1.79563	-0.874098	-0.159513	-0.921632	-1.34561	-1.14681	-1.17615	-0.888667	-1.90578	-1.11895	0.852536	0.853611	-0.435266	-0.480469	-0.977738	-1.01443	-1.02291	-0.589832	-0.980325
1546	chr10	123999806	124220830	-1.15972	-1.26815	-0.797573	-0.822016	-0.191336	-0.53243	-0.776	-0.716984	-0.995721	-0.523519	1.14683	1.08286	1.17888	-0.943981	-0.248481	-0.792757	-2.45039	-2.01781	-1.33827	-1.13681	-0.978055	-0.797912	-0.568767	-0.832638	-0.660208	-0.773073	-0.488465	-1.52848	-0.849859	1.30409	1.23962	-0.695308	-0.791104	-0.551839	-0.600209	-1.04386	0.115979	-0.801916
1541	chr10	123124950	123280812	-1.13194	-1.34381	-1.13954	-1.18526	-0.61017	-1.12385	-1.30619	-1.13728	-0.88652	-0.794666	0.702576	0.691809	0.579657	-1.2999	-0.223495	-1.21257	-3.63323	-3.38108	-1.59507	-1.46745	-0.726984	-1.11082	-0.790541	-0.983096	-0.885795	-1.15546	-1.31554	-1.80395	-1.0075	0.88028	0.871687	-1.04664	-1.19579	-0.869567	-0.914778	-1.88093	-0.0066323	-1.27782
1585	chr10	131512861	131665335	-1.26366	-1.50463	-0.997508	-1.08897	-0.669128	-1.24791	-1.49924	-1.15403	-1.0551	-1.08067	0.932759	0.94545	1.03292	-1.10697	-0.723533	-0.848004	-2.42603	-2.38166	-1.86415	-1.64562	-0.885027	0.717474	-1.02714	-1.18252	-1.06356	-0.868984	-0.0843342	-1.14764	-0.321592	1.11789	1.2639	0.00310418	-0.0398391	-0.825236	-0.787658	-0.300979	-0.155305	-0.020445
11035	chr8	69083901	69299519	-1.1276	-1.30692	-1.20173	-1.21993	-0.953549	-1.15157	-1.09806	-1.13073	-1.01359	-1.16238	1.02686	1.04135	0.765215	-1.29256	0.230578	-1.17832	-1.83418	-1.82232	-0.303769	-0.403581	-1.45253	-1.0083	-0.0324221	-0.112043	-0.0561081	-0.742013	-1.23352	-1.06583	-1.19464	1.02451	0.986461	-1.08304	-1.11899	-1.08063	-1.12629	-1.43531	-1.1137	-1.21233
291	chr1	64459048	64657147	-1.06606	-1.13298	-0.921141	-0.962498	-0.808327	-1.02591	-0.989365	-0.965989	-0.659736	-0.341594	1.05207	0.80949	1.0561	-0.65393	-0.399051	-0.19546	-2.10649	-1.91177	-1.25073	-0.967948	-1.17509	-1.00516	-0.606735	-0.765102	-0.616967	-0.560926	-0.885215	-1.00833	-0.790522	1.26177	1.35884	-0.540654	-0.569968	-0.798095	-0.869731	-1.17901	-0.978409	-0.794464
1586	chr10	131665335	131903189	-1.03568	-1.13341	-0.71025	-0.769413	-0.354166	-0.945854	-1.30025	-0.844571	-1.05281	-0.928586	0.921945	0.987602	1.17194	-0.949846	-0.687387	-0.936121	-2.59206	-2.48064	-1.64243	-1.74333	-0.999393	0.545274	-0.838011	-1.0632	-0.965056	-0.822793	-0.463524	-1.76073	-0.937339	0.969349	1.16248	-0.130728	-0.258665	-0.75369	-0.761331	-0.492021	-0.293646	-0.484597
1547	chr10	124220830	124412328	-1.09245	-1.23014	-0.668084	-0.763219	-0.0427754	-0.594967	-0.675288	-0.608445	-0.945378	-0.385381	1.02083	1.0419	1.13055	-0.657162	-0.350558	-0.552719	-1.84282	-1.58799	-1.37411	-1.309	-0.906178	-1.1604	-0.920382	-1.48964	-1.08008	-0.825347	-0.0451805	-0.705048	-0.496151	1.43708	1.42358	-0.769698	-0.834818	-0.575704	-0.62218	-0.679519	0.55665	-0.652446
6254	chr2	235796536	236008450	-0.934965	-1.02806	-1.00908	-1.03062	-0.844119	-1.13771	-1.26571	-0.928659	-0.83872	-0.853792	1.19959	1.2851	1.0378	-0.174478	-0.665062	-0.520768	-2.72743	-2.65797	-1.05479	-0.721232	-0.480562	0.355503	-0.731257	-0.625913	-0.70652	-0.0299313	-1.31031	-0.778232	-0.887468	0.834953	0.920419	-0.587353	-0.516382	-0.992285	-0.973141	-1.24328	-0.525261	-1.11708
6253	chr2	235582062	235796536	-0.965344	-0.949344	-0.965293	-1.01134	-0.646978	-1.05843	-0.966539	-1.03503	-0.957284	-0.994601	0.977646	1.02309	0.948661	-0.782097	-0.690649	-0.732371	-2.99429	-3.10419	-1.33939	-1.108	0.190655	-0.0188551	-0.893415	-1.09978	-1.04931	0.0240181	-1.13923	-1.18206	-0.866615	1.01831	1.00821	-0.510643	-0.479167	-0.993899	-1.04534	-0.883767	-0.505407	-1.16508
1588	chr10	132113594	132324684	-1.20056	-1.50029	-1.27451	-1.39632	-0.89829	-1.28583	-1.16297	-1.28041	-0.897805	-0.625881	0.982542	0.9418	0.918734	-1.25174	-0.926861	-1.291	-2.42465	-2.22702	-1.76657	-1.6363	-0.959653	-0.938393	-0.952379	-1.27523	-1.12199	-1.40414	-0.906605	-1.87507	-1.21401	0.345888	0.209885	-0.682442	-0.728123	-0.994221	-1.02876	-1.27372	-1.147	-1.28668
6252	chr2	235400540	235582062	-0.9297	-0.954309	-0.853924	-0.941932	-0.142858	-0.897725	-1.39334	-0.887953	-0.954864	-1.00124	0.79805	1.08192	0.936237	-1.00148	-0.647912	-0.849712	-2.75477	-2.89253	-1.02205	-0.937753	0.53868	-0.342298	-1.18184	-1.32281	-1.27224	0.241112	-0.999016	-1.11928	-0.994604	1.14926	1.22301	-0.399892	-0.424609	-1.01808	-1.06807	-0.57536	-0.407632	-1.19481
1542	chr10	123280812	123439909	-1.03991	-1.26908	-0.787307	-0.797735	-0.352548	-0.846747	-1.14059	-0.892599	-0.732453	-0.518764	0.756007	0.727052	0.661993	-1.21336	-0.191077	-1.16541	-3.99719	-3.47002	-1.46694	-1.26449	-0.745027	-1.07355	-0.436203	-0.694917	-0.573869	-1.03477	-1.29253	-1.63872	-0.901515	0.917622	0.939801	-0.971643	-1.09423	-0.646405	-0.705818	-1.98878	-0.0294793	-1.16159
1544	chr10	123629870	123847744	-0.658986	-0.810121	-0.335964	-0.426422	0.0762302	-0.141479	-0.517343	-0.353367	-0.63969	-0.360765	0.896704	1.13356	0.979143	-0.849956	-0.38941	-0.999804	-2.18977	-1.88652	-1.02758	-1.08451	-1.03498	-0.862137	-0.368307	-0.478856	-0.451319	-1.02405	-0.843806	-1.5333	-0.790166	1.31961	1.34836	-0.863765	-0.941279	-0.449636	-0.468279	-1.37915	-0.359814	-0.875031
1590	chr10	132525430	132704589	-1.1256	-1.41499	-1.07518	-1.10879	-0.970064	-1.14068	-1.08986	-1.18831	-0.977364	-0.926909	0.994462	0.954927	1.17677	-1.33113	-0.765881	-1.00749	-2.54244	-2.28042	-2.36442	-2.04936	-0.950425	-1.16602	-1.10547	-1.51501	-1.33073	-1.51623	-1.07919	-1.79353	-1.74607	-0.0822155	-0.0342861	-0.45287	-0.463124	-0.922136	-0.960981	-1.43091	-0.859819	-1.25059
11034	chr8	68896095	69083901	-1.21039	-1.37571	-1.1216	-1.07775	-0.922516	-1.19653	-0.990493	-1.15943	-1.26475	-1.05472	1.09883	1.30012	0.837649	-1.12752	0.386616	-1.16113	-1.60855	-1.65899	-0.309475	-0.284806	-1.23659	-1.1073	0.391048	0.455333	0.407914	-0.527676	-1.03684	-1.26282	-1.1453	0.840369	0.814775	-1.06017	-1.11181	-1.11592	-1.13469	-1.26636	-1.19583	-1.11917

## Sheet: TCF3-PBX1 genes
Region	Gene	Strand	CHR	txStart	txEnd
1954	CTSC	-	chr11	87666407	87710589
5648	SNORD89	-	chr2	101255829	101255943
5648	RNF149	-	chr2	101258984	101291584
5648	CREG2	-	chr2	101331656	101370489
8235	GPR103	-	chr4	122469246	122521631
7277	GABRR3	-	chr3	99188216	99236521
7277	OR5AC2	+	chr3	99288706	99289636
7277	OR5H1	+	chr3	99334231	99335173
7277	OR5H14	+	chr3	99350919	99351852
7277	OR5H15	+	chr3	99370233	99371175
7277	OR5H6	+	chr3	99465818	99466796
7277	OR5H2	+	chr3	99484421	99485366
726	PTGS2	-	chr1	184907591	184916179
1796	SYT13	-	chr11	45218428	45264460
9608	LMBRD1	-	chr6	70442469	70563609
7778	CC2D2A	+	chr4	15080586	15212278

## Sheet: REH regions
Region	CHR	Start	End	C0202Lymph.R1	C0202Lymph.R2	GM06990Lymph.R1	GM06990Lymph.R2	GM06999Lymph.R1	GM06999Lymph.R2	NC.NC.R1	NC.NC.R2	REH.R1	REH.R2	RCH.ACV.R1	RCH.ACV.R2	RCH.ACV.R3	MHHCALL2.R1	X10.356.R1	X10.668.R1	X10.764.R1	X10.770.R1	X10.770.R2	X10.771.R1	X10.771.R2	X10.799.R1	X10.799.R2	X10.820.R1	X10.822.R1	X10.822.R2	X10.822.R3	X10.828.R1	X10.838.R1	X11.015.R1	X11.015.R2	X11.064.R1	X11.064.R2	X11.118.R1	X11.118.R2	X11.132.R1	X11.132.R2	X11.220.R1	X11.221.R1	X11.253.R1
1752	chr11	35238569	35394016	1.28208	1.07808	1.07085	1.1368	1.25328	1.07097	1.48619	1.03673	-1.17063	-1.15111	1.22455	1.33743	1.09216	1.43381	1.11868	1.11228	1.7718	1.4772	1.48814	0.794078	0.782866	-0.108664	-0.0327062	1.16192	1.11984	1.1278	1.07704	1.38853	1.13982	2.01887	1.3721	1.11708	1.0964	0.617911	0.656132	1.21822	1.22928	0.948666	1.10666	1.18836
1753	chr11	35394016	35558983	0.72236	0.773847	1.03382	0.996015	1.27028	0.884367	1.34176	1.05723	-1.25299	-1.02453	1.29222	1.30535	1.10056	1.24517	1.15366	1.07902	1.38928	1.11867	1.07998	0.724679	0.616933	-0.359463	-0.246678	1.1327	0.513387	0.573678	0.534907	0.910404	0.868452	1.47519	1.05356	1.32923	1.33977	0.602535	0.685603	1.30037	1.35531	1.24783	1.10058	1.03952
1751	chr11	35057858	35238569	1.30111	0.994183	0.754866	0.796341	0.724634	1.05536	0.871249	0.752699	-0.821727	-1.06666	1.09914	1.2304	1.07667	1.27757	1.04915	0.800407	1.50279	1.76643	1.78766	0.648899	0.720856	0.19718	0.356555	0.963389	1.03644	1.05161	1.11475	0.926803	1.0391	1.64527	0.693102	0.921947	0.930478	0.550642	0.621338	1.01411	0.873866	0.904445	0.500769	0.938964
9220	chr5	163259718	163453285	-1.08958	-1.2355	-1.11124	-1.07712	-0.893263	-0.983009	-0.987595	-0.968592	0.847513	0.814495	-1.08859	-1.01534	-1.06107	-1.11564	-0.845164	-1.08506	-1.22801	-1.29711	-1.17114	-1.09449	-1.30023	-0.841644	-0.732869	-0.33063	-1.17152	-1.02824	-1.01128	-0.710749	-1.10511	-0.927219	-1.36538	-1.15712	-0.94053	-0.139384	-0.0971031	-0.853246	-0.944316	-1.26148	-0.844382	-1.10656
9221	chr5	163453285	163678700	-1.06241	-1.16279	-0.9943	-1.01302	-1.05039	-0.85438	-0.935315	-0.958075	0.890591	0.87697	-1.06331	-1.03679	-1.10619	-1.04577	-0.861776	-1.00024	-1.09357	-0.931159	-0.737242	-0.917854	-0.990467	-0.957825	-0.349127	0.181874	-0.873784	-0.636575	-0.71101	-0.743337	-1.04079	-0.885034	-1.14854	-1.12806	-0.979485	-0.05758	0.0471997	-1.05739	-1.09836	-1.35713	-0.704918	-0.893203
1749	chr11	34612079	34820098	0.786057	0.863277	1.00715	0.906489	1.16789	0.79103	1.34533	1.0007	-0.864485	-0.906367	0.799817	0.893128	0.77335	0.835181	1.15409	1.05169	1.47868	1.07314	1.16028	0.557107	0.309521	-0.479839	-0.262289	0.952172	0.841387	0.995923	0.940376	0.845836	0.711799	1.15418	0.622103	1.02182	1.0621	0.628706	0.757106	1.2419	1.23794	1.20975	0.286083	1.12475
1754	chr11	35558983	35747459	0.0164019	0.1325	0.794493	0.768839	0.858796	0.236872	0.6083	0.474758	-1.18974	-0.715037	1.18272	1.24259	1.17471	0.829086	0.950512	0.952391	1.36706	1.22095	1.2291	0.519241	0.24399	-0.299194	-0.0459138	0.9371	0.0882527	0.0968871	0.0259954	1.26666	0.964843	1.10907	0.952756	1.44322	1.4755	0.488288	0.53985	1.07508	1.06417	1.18394	2.3195	0.79259
1750	chr11	34820098	35057858	1.08737	0.911028	0.819007	0.786508	0.7214	1.07379	0.918401	0.829632	-0.874486	-0.962391	0.929745	0.881652	0.860697	0.9894	1.13355	0.777684	0.389771	1.6565	1.67053	0.669608	0.479514	-0.0429786	0.321604	0.908313	0.915253	0.933688	0.971512	0.884007	0.879551	1.15602	0.20755	0.821428	0.870935	0.560162	0.692306	0.988938	0.887454	0.910845	0.00698924	0.801744
4120	chr16	53022398	53148193	-1.45454	-1.49421	-1.18811	-1.26243	-0.816194	-1.26427	-1.02751	-1.13109	1.10459	0.459574	0.203298	0.272897	0.297128	-0.917047	-0.360954	-1.13073	0.134951	-2.93904	-2.87641	-1.9792	-1.74959	-0.163566	0.00429429	-0.911548	-1.62199	-1.86473	-1.66092	-1.08804	-1.11157	-1.23823	-0.618148	-0.690647	-0.6665	0.0283046	0.0118397	0.27789	0.260636	-0.561438	0.284521	-1.11019
9222	chr5	163678700	163878113	-1.09211	-1.15349	-0.999269	-0.991776	-1.08177	-0.749265	-1.02463	-1.10657	0.64408	0.75465	-1.09772	-1.12042	-0.9711	-0.873402	-0.883981	-0.982426	-1.32091	-0.988502	-0.663915	-1.04408	-0.836516	-0.812575	-0.0376942	-0.227064	-0.839265	-0.651576	-0.683937	-0.690008	-0.658109	-1.05277	-1.06784	-1.22687	-1.09634	-0.0910099	-0.0451379	-1.07508	-1.1091	-1.42791	-0.741203	-0.896049
11379	chr9	286785	508235	-0.0484689	0.166165	0.669427	0.731201	0.915997	0.535486	0.630399	0.597017	-0.527309	-0.982802	0.527567	0.577493	0.495797	0.776322	1.00624	0.603907	1.43849	0.557278	0.89299	1.09654	0.974616	0.30074	0.57657	0.99651	1.06743	1.09323	1.06785	1.05544	0.847741	1.7579	1.14908	1.33685	1.21568	0.173545	0.243681	1.12041	1.14333	0.791001	0.862011	1.10288
11150	chr8	96615394	96834766	-0.0741185	0.0931988	0.484631	0.390048	0.627426	0.0322336	-0.00666968	0.101089	-1.03869	-0.525193	0.421575	0.387996	0.377011	0.692074	0.996405	0.978847	1.30275	2.26168	1.9884	1.29316	1.01829	0.704101	1.29135	0.798646	0.950738	1.03092	0.979083	0.572161	0.822431	0.632735	0.62586	1.05988	1.19421	1.1151	1.34505	0.965003	1.02462	0.954906	0.608791	0.916648
5184	chr19	57081900	57245507	-1.05221	-0.646674	-0.17506	-0.27098	0.192641	-0.228087	-0.259937	0.0621689	-1.12071	-0.904255	1.1156	1.31215	1.19113	-0.0945478	1.02449	-0.147939	0.955275	1.79821	1.70506	0.224398	0.140523	0.36412	0.974535	0.538838	0.679884	0.848115	0.833245	1.1513	0.208408	0.660129	1.26833	0.509569	0.44667	0.859106	0.93721	0.878373	0.830996	0.0782898	1.25514	-0.286003
4119	chr16	52850875	53022398	-1.43591	-1.33797	-1.07507	-1.13804	-0.694678	-1.08366	-1.24878	-1.02442	1.02371	0.517118	0.307173	0.508049	0.583279	-0.777785	-0.139507	-0.946921	0.298443	-3.01882	-3.03373	-1.85727	-1.66778	0.318316	0.322783	-0.621229	-1.29088	-1.5573	-1.47497	-0.91908	-0.937944	-1.29991	-0.394251	-0.586391	-0.592588	0.0649473	0.0450452	0.347812	0.350782	-0.395243	0.0476205	-0.947423
5183	chr19	56892838	57081900	-1.008	-0.563775	0.192841	0.13285	0.431044	0.110926	0.131619	0.399146	-1.12968	-0.788824	0.996608	1.18543	1.26186	0.00375947	1.02224	0.0128192	0.95074	1.1636	1.02863	0.0181141	0.0651388	0.231563	0.417632	0.889355	0.673693	0.633202	0.653753	1.2205	0.296901	0.903458	1.2092	0.127895	0.109264	1.07269	1.17664	1.15365	1.10887	0.0807678	1.36317	-0.0954838
300	chr1	66208903	66419607	0.934903	0.966596	0.917352	0.913896	0.937002	0.670161	0.926816	0.898576	-0.793777	-0.924686	-0.484764	-0.471152	-0.418459	0.725824	0.874423	0.417733	0.953443	2.15263	1.71632	1.27871	1.05839	-1.25343	-0.512026	0.737221	0.591025	0.600533	0.588212	-0.534788	-0.314542	1.26565	0.650345	0.805853	0.808991	0.737939	0.723815	0.0958874	0.103807	0.698506	0.239248	0.928675
1070	chr10	14035175	14199857	0.924271	0.791077	1.03013	1.0927	1.14479	0.967182	1.25958	1.06688	-0.521076	-0.4187	0.867782	1.04461	0.855668	1.13756	0.245839	0.936495	0.626274	0.810131	0.836671	1.37236	1.37722	0.625529	0.471652	0.807297	0.783612	0.796557	0.73308	0.781806	1.33976	1.24118	1.26122	1.17721	1.19794	1.1831	1.27829	1.38189	1.32873	1.33451	1.3019	0.864558
9391	chr6	15525584	15685145	-0.277653	-0.0610826	0.552033	0.429258	0.38081	-0.140781	0.181281	0.394866	-0.664177	-0.542951	0.564504	0.760773	0.774067	1.14405	1.20507	0.391801	1.00061	1.88487	1.52757	0.656209	0.758728	0.1192	0.264121	1.17732	0.600813	0.648737	0.622591	1.7451	0.794098	1.47239	1.34046	1.57779	1.64247	0.726314	0.75865	1.46226	1.36945	0.744832	2.23234	0.770037
1147	chr10	31167852	31405679	0.490793	0.462892	0.735272	0.750691	0.996545	0.517107	1.24995	0.999566	-0.578249	-0.589125	0.112407	0.242199	0.461403	0.406979	1.17924	0.0953712	0.693811	1.16519	1.28721	0.806585	1.1497	1.03876	1.26712	0.703098	0.90876	1.06692	1.00458	0.57646	0.845178	0.714346	0.856702	0.663114	0.723025	0.975917	0.925537	1.15739	1.29213	1.22801	1.49892	0.9902
9009	chr5	124010971	124136183	-0.922165	-0.856901	-0.0833204	-0.123244	0.221717	-0.0517196	0.458559	0.418861	0.93932	1.0739	0.484063	0.684879	0.53877	-0.406237	-0.72893	0.91243	-0.143797	-0.80449	-0.794201	-1.65419	-1.54279	-0.943991	-1.32621	-0.165588	-1.51398	-1.54023	-1.54581	-0.569764	-0.775724	-0.393089	-0.829131	0.820979	0.77587	-1.08309	-1.09283	0.473101	0.513074	-1.36949	-0.311842	-0.0246865

## Sheet: REH genes
Region	Gene	Strand	CHR	txStart	txEnd
1753	DKFZP586H2123	-	chr11	35409951	35503752
1751	CD44	+	chr11	35116992	35210525
1754	FJX1	+	chr11	35596310	35598995
1750	APIP	-	chr11	34860418	34894515
1750	PDHX	+	chr11	34894252	34974250
5184	ZNF649	-	chr19	57084299	57100059
5184	ZNF613	+	chr19	57122499	57140817
5184	ZNF350	-	chr19	57159404	57181891
5184	ZNF615	-	chr19	57186399	57203270
5184	ZNF614	-	chr19	57208388	57223429
5184	ZNF432	-	chr19	57228488	57243885
4119	IRX3	-	chr16	52874712	52877879
5183	HAS1	-	chr19	56908176	56919033
5183	FPR1	-	chr19	56940837	56946962
5183	FPR2	+	chr19	56956264	56965591
5183	FPR3	+	chr19	56990222	57021146
1147	ZNF438	-	chr10	31173570	31313361

[truncated: 2 more sheets: 10-838 regions, 10-838 genes]
